# Supplementary material for: Chemical perspectives on heteroanionic compounds: a potential playground for multiferroics
Source: Royal Society of Chemistry journal article supplement (doi:10.1039/d4qm00454j), 2024-01-01
Supplement: d4qm00454j1.pdf [file d4qm00454j1.pdf]

Chemical Perspectives of Heteroanionic Compounds and their Applications for Superconductors, Photoluminescent response, Nonlinear optical materials, and Thermoelectrics

Karishma Prasad #, Vivian Nguyen #, Bingheng Ji #, Jasmine Quah , Danielle Goodwin , Jian Wang \*

Department of Chemistry and Biochemistry, Wichita State University, Wichita, Kansas 67260, United States

# Equally contributed

Corresponding author: Jian Wang [jian.wang@wichita.edu](mailto:jian.wang@wichita.edu)

1. **Table S1.** Selected heteroanionic compounds synthesized by hydrothermal/solvothermal reactions
2. **Table S2.** Selected heteroanionic compounds synthesized by high temperature flux methods.
3. **Table S3.** Selected heteroanionic compounds synthesized by high temperature solid state methods
4. **Table S4.** Selected Oxohalides with structural information and physical properties.
5. **Table S5.** Selected Oxysulfides and Oxyselenides with structural information and physical properties.
6. **Table S6.** Selected oxypnictides with structural information and physical properties.
7. **Table S7.** Selected other heteroanionic combinations with structural information and physical properties (N-Cl, S-Cl, Se-Cl, P-Cl, P-Br, etc.).

**Table S1.** Selected heteroanionic compounds synthesized by hydrothermal/solvothermal reactions

| Compounds                                                    | Synthetic conditions                                                                                                                                                                                                                                                                                                                                                                                                                     | Products                                        | Ref |
|--------------------------------------------------------------|------------------------------------------------------------------------------------------------------------------------------------------------------------------------------------------------------------------------------------------------------------------------------------------------------------------------------------------------------------------------------------------------------------------------------------------|-------------------------------------------------|-----|
| $[\text{O}_2\text{Pb}_3]_2(\text{BO}_3)\text{I}$             | $\text{PbI}_2$ (0.52 mmol, 0.240 g), $\text{LiBO}_2$ (5.23 mmol, 0.260 g), and distilled water (6 mL) was sealed in an autoclave equipped with teflon liner (23 mL). The autoclave was heated to 220 °C for 72 h                                                                                                                                                                                                                         | Crystal size-- 0.177 mm × 0.160 mm × 0.054 mm   | 1   |
| $\text{Li}_4(\text{B}_7\text{O}_{12})\text{Cl}$              | Heating $\text{B}_2\text{O}_3/\text{Li}_2\text{O}$ mixtures in molar ratios at about 900K in an excess of fused $\text{LiCl}$ or $\text{LiBr}$ .                                                                                                                                                                                                                                                                                         | polycrystalline powder                          | 2   |
| $\text{K}_2\text{Bi}_2(\text{SeO}_3)_3\text{F}$              | $\text{KF}\cdot 2\text{H}_2\text{O}$ (2 mmol, 188 mg), $\text{SeO}_2$ (2 mmol, 222 mg), $\text{Bi}_2\text{O}_3$ (0.4 mmol, 187 mg) and 40.0 % solution of $\text{HF}$ (25 $\mu\text{L}$ ) were put together with 2 mL $\text{H}_2\text{O}$ . then sealed in autoclave equipped with a Teflon liner and gradually heated to 270C, held for 66 hours.                                                                                      | polycrystalline powder                          | 3   |
| $\text{Bi}_3(\text{SeO}_3)_3(\text{Se}_2\text{O}_5)\text{F}$ | $\text{Bi}_2\text{O}_3$ ( $4.00\times 10^{-4}$ mol ,0.186 g) and $\text{SeO}_2$ ( $1.60\times 10^{-3}$ mol ,0.178 g) loaded in a 23 mL Teflon cup.0.1mL of $\text{HF}$ (50%, aq) solution added to the mixture. The Teflon cup loaded in an autoclave. The autoclave was heated to 230°C at a rate of 1°C min <sup>-1</sup> , dwelled at the temperature for 72 h, and cooled to room temperature at a rate of 0.1°C min <sup>-1</sup> . | Crystal size-- (0.034 mm × 0.141 mm × 0.449 mm) | 4   |
| $\text{Rb}_3\text{SbF}_3(\text{NO}_3)_3$                     | $\text{SbF}_3$ (1.00 mmol, 0.179 g), $\text{RbNO}_3$ (4.00 mmol ,0.588 g) were added into 5 mL of deionized water with a few drops of concentrated nitrate acid inhibiting the hydrolysis of $\text{SbF}_3$ , and the mixture was stirred for 20 minutes while heating at 80 °C.                                                                                                                                                         | polycrystalline powder                          | 5   |

**Table S2.** Selected heteroanionic compounds synthesized by high temperature flux methods.

| Compounds                                        | Synthetic conditions                                                                                                                                                                                                                                            | Products               | Ref |
|--------------------------------------------------|-----------------------------------------------------------------------------------------------------------------------------------------------------------------------------------------------------------------------------------------------------------------|------------------------|-----|
| Zn <sub>6</sub> S <sub>5</sub> Cl <sub>2</sub>   | ZnCl <sub>2</sub> (1 mmol, 136 mg), Zn (5 mmol, 325 mg) and S (5 mmol, 160 mg) the tube was heated to 500 °C in 12 h                                                                                                                                            | polycrystalline powder | 6   |
| Eu <sub>2</sub> B <sub>5</sub> O <sub>9</sub> S  | Eu <sub>2</sub> O <sub>3</sub> , S, B, and B <sub>2</sub> O <sub>3</sub> , KI as the flux. The tube heated from room temperature to 1223 K at the speed of 60 K/h, homogenized for 10 days, and finally cooled to 573 K in 5 days with the furnace powered off. | polycrystalline powder | 7   |
| Zn <sub>4</sub> B <sub>6</sub> O <sub>12</sub> S | ZnO, B <sub>2</sub> O <sub>3</sub> , S, and B were mixed in a molar ratio of 12:8:3:2, KI as flux. The quartz tube was heated to 950 °C in 25 h                                                                                                                 | polycrystalline powder | 8   |
| GdFeAsO                                          | As and Gd mixed with NaI/KI. the ampoules were slowly heated to 1320 K within 24 h. An annealing period of three to six days was applied, followed by slow cooling to 870 K with 1 K/h                                                                          | polycrystalline powder | 9   |
| Zn <sub>2</sub> NX (X = Cl, Br)                  | Zn <sub>3</sub> N <sub>2</sub> and ZnCl <sub>2</sub> were evenly mixed with a 1:2 molar ratio. The excess of zinc halide as a flux, the mixture was heated to 600 °C within 24 h,                                                                               | polycrystalline powder | 10  |

**Table S3.** Selected heteroanionic compounds synthesized by high temperature solid state methods

| Compounds                                                                                   | Synthetic conditions                                                                                                                                                                                                                               | Products                                 | Ref |
|---------------------------------------------------------------------------------------------|----------------------------------------------------------------------------------------------------------------------------------------------------------------------------------------------------------------------------------------------------|------------------------------------------|-----|
| Pb <sub>8</sub> B <sub>9</sub> O <sub>21</sub> F                                            | PbO (0.0375 mol, 8.37 g), PbF <sub>2</sub> (0.0025 mol 0.613 g.) and H <sub>3</sub> BO <sub>3</sub> (0.045 mol ,2.78 g,) in air. Then the reaction mixture was elevated to 500 °C and sintered at this temperature for 48 h .                      | polycrystalline powder                   | 11  |
| Cs <sub>3</sub> B <sub>3</sub> O <sub>3</sub> F <sub>6</sub>                                | CsBF <sub>4</sub> (3 mmol, 0.370 g), CsF (6 mmol, 0.908 g), and H <sub>3</sub> BO <sub>3</sub> (6 mmol, 0.722 g) for Cs <sub>3</sub> B <sub>3</sub> O <sub>3</sub> F <sub>6</sub> , heated to 350 °C and held at this temperature in air for 10 h. | Crystal size- (1×1×0.5 mm <sup>3</sup> ) | 12  |
| BaTi <sub>2</sub> Bi <sub>2</sub> O or (SrF) <sub>2</sub> Ti <sub>2</sub> Bi <sub>2</sub> O | BaO, SrF <sub>2</sub> , SrO, Ti, Bi heated for 50 h at 850°C for BaTi <sub>2</sub> Bi <sub>2</sub> O and at 900°C for (SrF) <sub>2</sub> Ti <sub>2</sub> Bi <sub>2</sub> O, followed by controlled cooling at a rate of 25°C/h to room temperature | polycrystalline powder                   | 13  |
| SrZnSO:Bi <sup>3+</sup>                                                                     | SrCO <sub>3</sub> , ZnS, Bi <sub>2</sub> O <sub>3</sub> and H <sub>3</sub> BO <sub>3</sub> here, H <sub>3</sub> BO <sub>3</sub> acts as a fluxing agent to lower the sintering temperature, sintered at 1050 °C for 9 h                            | polycrystalline powder                   | 14  |
| Ba <sub>2</sub> Ti <sub>2</sub> Cr <sub>2</sub> As <sub>4</sub> O                           | Ba, Ti, As, Cr and TiO <sub>2</sub> , heated to 1253 K in an evacuated quartz tube, holding for 1500 min.                                                                                                                                          | polycrystalline powder                   | 15  |

**Table S4.** Selected Oxohalides with structural information and physical properties.

| Formula                                                                                             | Space Group                                      | Structure Type                                                                   | Structure Units                                                                                                                       | Properties                                                                                                                          | Ref  |
|-----------------------------------------------------------------------------------------------------|--------------------------------------------------|----------------------------------------------------------------------------------|---------------------------------------------------------------------------------------------------------------------------------------|-------------------------------------------------------------------------------------------------------------------------------------|------|
| Li(SO <sub>3</sub> F)                                                                               | <i>C2/m</i>                                      |                                                                                  | [LiO <sub>4</sub> ] [SO <sub>3</sub> F]                                                                                               |                                                                                                                                     | 16   |
| LiNaCoPO <sub>4</sub> F                                                                             | <i>P2<sub>1</sub>/c</i>                          | LaNaNiPO <sub>4</sub> F                                                          | [CoO <sub>4</sub> F <sub>2</sub> ] [PO <sub>4</sub> ]                                                                                 | Eg(cal)=4.5 V                                                                                                                       | 17   |
| BaZnBe <sub>2</sub> (BO <sub>3</sub> ) <sub>2</sub> F <sub>2</sub>                                  | <i>P -3</i>                                      |                                                                                  | [BaO <sub>6</sub> F <sub>6</sub> ] [ZnO <sub>6</sub> ]                                                                                | Eg(cal) = 4.55 eV Δn = 0.063 at 1064 nm                                                                                             | 18   |
| Pb <sub>2</sub> (V <sub>2</sub> O <sub>4</sub> F)(VO <sub>2</sub> )(SeO <sub>3</sub> ) <sub>3</sub> | <i>P 2<sub>1</sub>2<sub>1</sub>2<sub>1</sub></i> |                                                                                  | [VO <sub>5</sub> F] [VO <sub>6</sub> ]<br>[VO <sub>5</sub> ] [SeO <sub>3</sub> ]                                                      | SHG: 0.3 × (KDP),<br>Eg(exp)= 2.35 eV LDT= 61 × AgGaS <sub>2</sub>                                                                  | 19   |
| KYb(SO <sub>4</sub> )F <sub>2</sub>                                                                 | <i>P2<sub>1</sub>/m</i>                          |                                                                                  | [YbO <sub>4</sub> F <sub>4</sub> ]                                                                                                    | Eg(exp)= 5.36eV,<br>paramagnetic behavior<br>down to 2 K with a<br>dominant<br>antiferromagnetic coupling<br>between spin carriers. | 20   |
| (Ba <sub>3</sub> F)(Ta <sub>4</sub> O <sub>12</sub> F)                                              | <i>P4<sub>2</sub>/mn<br/>m</i>                   |                                                                                  | [TaO <sub>6</sub> ] [TaO <sub>5</sub> F]                                                                                              |                                                                                                                                     | 21   |
| Na <sub>3</sub> Fe <sub>2</sub> (PO <sub>4</sub> ) <sub>2</sub> F <sub>3</sub>                      | <i>P4<sub>2</sub>/mn<br/>m</i>                   | Na <sub>3</sub> V <sub>2</sub> (PO <sub>4</sub> ) <sub>2</sub><br>F <sub>3</sub> | [PO <sub>4</sub> ] [FeO <sub>4</sub> F <sub>2</sub> ]                                                                                 | Reasonable achievable<br>capacity and stable cycle<br>life for Li- ion batteries<br>with poor Na-ion capacity                       | 22   |
| α-Ba <sub>3</sub> Zn <sub>2</sub> (BO <sub>3</sub> ) <sub>3</sub> F                                 | <i>P2<sub>1</sub>/c</i>                          | Bi <sub>2</sub> MoO <sub>6</sub>                                                 | [ZnO <sub>2</sub> O <sub>2</sub> BO] <sub>2</sub><br>[Zn <sub>2</sub> O <sub>5</sub> O <sub>2</sub> BO][B<br>O <sub>3</sub> ]         |                                                                                                                                     | 23   |
| (ClO <sub>2</sub> F)(NbF <sub>6</sub> )                                                             | <i>Pna2<sub>1</sub></i>                          | (ClO <sub>2</sub> F)(AsF <sub>6</sub> )                                          | [ClO <sub>2</sub> F] <sup>+</sup> [NbF <sub>6</sub> ] <sup>-</sup>                                                                    |                                                                                                                                     | 24   |
| Mg <sub>7</sub> Ge <sub>2</sub> O <sub>10</sub> F <sub>2</sub>                                      | <i>Pbam</i>                                      |                                                                                  | [MgO <sub>4</sub> F <sub>2</sub> ]<br>[GeO <sub>4</sub> ]                                                                             |                                                                                                                                     | 25   |
| Lu <sub>3</sub> F(SeO <sub>3</sub> ) <sub>4</sub>                                                   | <i>P6<sub>3</sub></i>                            |                                                                                  | [SeO <sub>3</sub> ] [LuO <sub>7</sub> F]                                                                                              | SHG:2.5 × KDP,<br>Eg(exp)=3.57 eV, LDT:<br>36 × AgGaS <sub>2</sub>                                                                  | 26   |
| KMoO <sub>2</sub> F <sub>3</sub>                                                                    | <i>P2<sub>1</sub>2<sub>1</sub>2<sub>1</sub></i>  |                                                                                  | [MoO <sub>2</sub> F <sub>4</sub> ]                                                                                                    |                                                                                                                                     | 27   |
| CsSiP <sub>2</sub> O <sub>7</sub> F                                                                 | <i>P2<sub>1</sub></i>                            |                                                                                  | [SiP <sub>2</sub> O <sub>10</sub> F] made<br>by [SiO <sub>5</sub> F] and<br>[P <sub>2</sub> O <sub>7</sub> ]                          | SHG: 0.7 × KDP, Eg(cal)<br>=6.4 eV                                                                                                  | 28   |
| Li <sub>3</sub> CaB <sub>2</sub> O <sub>5</sub> F                                                   | <i>Pnma</i>                                      |                                                                                  | [B <sub>2</sub> O <sub>5</sub> ] [LiO <sub>4</sub> F]<br>[LiO <sub>2</sub> F <sub>3</sub> ]                                           |                                                                                                                                     | 29   |
| KLa(PO <sub>2</sub> F <sub>2</sub> ) <sub>4</sub>                                                   | <i>P2<sub>1</sub>/c</i>                          |                                                                                  | [KO <sub>6</sub> F <sub>4</sub> ] <sup>15-</sup><br>[PO <sub>2</sub> F <sub>2</sub> ] <sup>-</sup> [LaO <sub>8</sub> ] <sup>13-</sup> | Eg(cal) =5.87 eV, Δn =<br>0.023 at 1064 nm                                                                                          | 30   |
| Bi <sub>3</sub> (SeO <sub>3</sub> ) <sub>3</sub> (Se <sub>2</sub> O <sub>5</sub> )F                 | <i>P2<sub>1</sub></i>                            |                                                                                  | [BiO <sub>7</sub> ], BiO <sub>6</sub> F]<br>[SeO <sub>3</sub> ] [Se <sub>2</sub> O <sub>5</sub> ]                                     | SHG: 8 × KDP,<br>Eg(exp)=3.8 eV                                                                                                     | 4    |
| CsGa <sub>3</sub> F <sub>6</sub> (SeO <sub>3</sub> ) <sub>2</sub>                                   | <i>P6<sub>3</sub>mc</i>                          |                                                                                  | [GaO <sub>2</sub> F <sub>4</sub> ] [SeO <sub>3</sub> ]                                                                                | SHG: 5.4 × KDP,<br>Eg(exp)=3.65 eV                                                                                                  | 31   |
| RbGa <sub>3</sub> F <sub>6</sub> (SeO <sub>3</sub> ) <sub>2</sub>                                   | <i>P6<sub>3</sub>mc</i>                          |                                                                                  | [GaO <sub>2</sub> F <sub>4</sub> ] [SeO <sub>3</sub> ]                                                                                | SHG: 5.6 × KDP,<br>Eg(exp)=3.57 eV                                                                                                  | 31   |
| K <sub>4</sub> (PO <sub>2</sub> F <sub>2</sub> ) <sub>2</sub> (S <sub>2</sub> O <sub>7</sub> )      | <i>C2/c</i>                                      |                                                                                  | [S <sub>2</sub> O <sub>7</sub> ] <sup>2-</sup> [PO <sub>2</sub> F <sub>2</sub> ] <sup>-</sup>                                         | Eg(cal) =5.193 eV, Δn =<br>0.015 at 1064<br>nm                                                                                      | 32   |
| Ba(MoO <sub>2</sub> F) <sub>2</sub> (SeO <sub>3</sub> ) <sub>2</sub>                                | <i>Aba2</i>                                      |                                                                                  | [MoO <sub>5</sub> F] [SeO <sub>3</sub> ]                                                                                              | SHG: 2.8 ×KDP,                                                                                                                      | 33,3 |

|                                                                                                  |                                |                                                                    |                                                                                                                                                                                                    |                                                                                                                 |    |
|--------------------------------------------------------------------------------------------------|--------------------------------|--------------------------------------------------------------------|----------------------------------------------------------------------------------------------------------------------------------------------------------------------------------------------------|-----------------------------------------------------------------------------------------------------------------|----|
|                                                                                                  |                                |                                                                    |                                                                                                                                                                                                    | Eg(exp)=3.23 eV,<br>Eg(cal)=2.52 eV                                                                             | 4  |
| $\alpha$ -Na <sub>2</sub> Fe(PO <sub>4</sub> )F                                                  | <i>P2<sub>1</sub>/c</i>        | Na <sub>2</sub> Zr(SiO <sub>4</sub> )<br>O                         | [NaO <sub>4</sub> F <sub>2</sub> ] [PO <sub>4</sub> ]                                                                                                                                              | ca. 90 mAh g <sup>-1</sup>                                                                                      | 35 |
| CsZn <sub>2</sub> (BO <sub>3</sub> )F <sub>2</sub>                                               | <i>R32H</i>                    |                                                                    | [BO <sub>3</sub> ] [ZnO <sub>3</sub> F]                                                                                                                                                            | Eg(exp)=6.2 eV, SHG:<br>3.2×KDP                                                                                 | 36 |
| K <sub>2</sub> Sb(P <sub>2</sub> O <sub>7</sub> )F                                               | <i>P4bm</i>                    |                                                                    | [P <sub>2</sub> O <sub>7</sub> ] [SbO <sub>4</sub> F]                                                                                                                                              | $\Delta n = 0.157$ at 546 nm,<br>SHG: 4.0× KDP,<br>Eg(exp)=4.74 eV                                              | 37 |
| Li <sub>5</sub> VF <sub>4</sub> (SO <sub>4</sub> ) <sub>2</sub>                                  | <i>P2<sub>1</sub>/c</i>        |                                                                    | [V <sup>3+</sup> F <sub>2</sub> O <sub>4</sub> ] [SO <sub>4</sub> ]                                                                                                                                | high ionic conductivity of<br>$2.2 \times 10^{-2}$ mS cm <sup>-1</sup>                                          | 38 |
| Li(W <sub>2</sub> O <sub>2</sub> F <sub>9</sub> )                                                | <i>Pbcn</i>                    |                                                                    | [W <sub>2</sub> O <sub>2</sub> F <sub>9</sub> ] <sup>-</sup>                                                                                                                                       |                                                                                                                 | 39 |
| Pb <sub>2</sub> Al <sub>3</sub> F <sub>3</sub> (Te <sub>6</sub> F <sub>2</sub> O <sub>16</sub> ) | <i>P4/mbm</i>                  |                                                                    | [Te <sub>6</sub> F <sub>2</sub> O <sub>16</sub> ] <sup>10-</sup><br>[AlO <sub>4</sub> F <sub>2</sub> ]                                                                                             | Eg(exp)=4.1 eV,<br>Eg(cal)=2.13 eV                                                                              | 40 |
| FeNd <sub>2</sub> (SeO <sub>3</sub> ) <sub>4</sub> Cl                                            | <i>C2/c</i>                    |                                                                    | [NdO <sub>10</sub> ] [SeO <sub>3</sub> ]<br>[FeO <sub>4</sub> Cl]                                                                                                                                  | Possible “hidden<br>antiferromagnetic ordering<br>behavior”.                                                    | 41 |
| K <sub>2</sub> SnOF <sub>4</sub>                                                                 | <i>Pnma</i>                    |                                                                    | [SnO <sub>2</sub> F <sub>4</sub> ] <sup>4-</sup>                                                                                                                                                   |                                                                                                                 | 42 |
| K <sub>2</sub> WO <sub>3</sub> F <sub>2</sub>                                                    | <i>Pnma</i>                    |                                                                    | [WO <sub>4</sub> F <sub>2</sub> ] <sup>4-</sup>                                                                                                                                                    |                                                                                                                 | 42 |
| K <sub>5</sub> Sn <sub>2</sub> OF <sub>11</sub>                                                  | <i>Ama2</i>                    |                                                                    | [Sn <sub>2</sub> OF <sub>10</sub> ] <sup>4-</sup>                                                                                                                                                  |                                                                                                                 | 43 |
| RbBi(SeO <sub>3</sub> )F <sub>2</sub>                                                            | <i>P n m a</i>                 |                                                                    | [BiO <sub>3</sub> F <sub>4</sub> ] [SeO <sub>3</sub> ]                                                                                                                                             | Eg(exp)=4.01eV                                                                                                  | 44 |
| Na <sub>3</sub> Cs(MoO <sub>2</sub> F <sub>4</sub> ) <sub>2</sub>                                | <i>P2<sub>1</sub>/c</i>        |                                                                    | [MoO <sub>2</sub> F <sub>4</sub> ] <sup>2-</sup><br>[NaF <sub>6</sub> ] <sup>5-</sup><br>[NaOF <sub>7</sub> ] <sup>8-</sup> [IO <sub>3</sub> ] <sup>-</sup> ,<br>[MoO <sub>4</sub> ] <sup>2-</sup> | Eg(cal)=2.7 eV, $\Delta n =$<br>0.210 at 1064 nm                                                                | 45 |
| Cs <sub>3</sub> B <sub>3</sub> O <sub>3</sub> F <sub>6</sub>                                     | <i>Pbcn</i>                    |                                                                    | [B <sub>3</sub> O <sub>3</sub> F <sub>6</sub> ]<br>[BO <sub>2</sub> F <sub>2</sub> ]                                                                                                               | $\Delta n=0.0069$ at 532 nm),<br>Eg(cal)=5.772 eV                                                               | 12 |
| K <sub>2</sub> Bi <sub>2</sub> (SeO <sub>3</sub> ) <sub>3</sub> F <sub>2</sub>                   | <i>Cm</i>                      |                                                                    | [Bi(1)O <sub>6</sub> F <sub>2</sub> ]<br>[Bi(2)O <sub>5</sub> F <sub>2</sub> ]<br>[SeO <sub>3</sub> ]                                                                                              | Eg(exp)=3.72 eV, LDT=<br>81.3 (1) AgGaS <sub>2</sub> , $\Delta n =$<br>0.105(1) at 546.1 nm,<br>KDP: 15× KDP    | 3  |
| Rb <sub>2</sub> Bi <sub>2</sub> (SeO <sub>3</sub> ) <sub>3</sub> F <sub>2</sub>                  | <i>Cm</i>                      |                                                                    | [Bi(1)O <sub>6</sub> F <sub>2</sub> ]<br>[Bi(2)O <sub>5</sub> F <sub>2</sub> ]<br>[SeO <sub>3</sub> ]                                                                                              | Eg(exp)=3.73 eV,<br>LDTs=48.8 (2) × AgGaS <sub>2</sub> ,<br>$\Delta n = 0.088(2)$ at 546.1 nm,<br>SHG: 14.4×KDP | 3  |
| Al <sub>8</sub> (BO <sub>3</sub> ) <sub>4</sub> (B <sub>2</sub> O <sub>5</sub> )F <sub>8</sub>   | <i>P4<sub>2</sub>/nm<br/>c</i> |                                                                    | [AlO <sub>4</sub> F <sub>2</sub> ] [BO <sub>3</sub> ]<br>[B <sub>2</sub> O <sub>5</sub> ]                                                                                                          | Eg(cal)=5.74 eV                                                                                                 | 46 |
| PbB <sub>5</sub> O <sub>7</sub> F <sub>3</sub>                                                   | <i>Cmc2<sub>1</sub></i>        | CaB <sub>5</sub> O <sub>7</sub> F <sub>3</sub>                     | [BO <sub>3</sub> ] [BO <sub>3</sub> F]<br>[PbO <sub>6</sub> F <sub>3</sub> ]                                                                                                                       | SHG: 6 × KDP, $\Delta n =$<br>0.12 at 1064 nm                                                                   | 47 |
| La <sub>3</sub> F <sub>2</sub> Se <sub>2</sub> TaO <sub>4</sub>                                  | <i>Pnma</i>                    | La <sub>3</sub> NbSe <sub>2</sub> O <sub>4</sub><br>F <sub>2</sub> | [TaO <sub>5</sub> Se] <sup>7-</sup>                                                                                                                                                                |                                                                                                                 | 48 |
| (XeF <sub>5</sub> ) <sub>2</sub> (CrF <sub>6</sub> )(CrOF <sub>4</sub> ) <sub>2</sub>            | <i>P-1</i>                     |                                                                    | [XeF <sub>5</sub> ] <sup>+</sup> [Xe <sub>2</sub> F <sub>11</sub> ] <sup>+</sup><br>[CrOF <sub>5</sub> ] <sup>2-</sup><br>[Cr <sub>2</sub> O <sub>8</sub> F <sub>5</sub> ] <sup>2-</sup>           |                                                                                                                 | 49 |
| K(Mo <sub>2</sub> O <sub>2</sub> F <sub>9</sub> )                                                | <i>P2/c</i>                    |                                                                    | [Mo <sub>2</sub> O <sub>2</sub> F <sub>9</sub> ] <sup>-</sup>                                                                                                                                      |                                                                                                                 | 50 |
| Rb <sub>3</sub> SbF <sub>3</sub> (NO <sub>3</sub> ) <sub>3</sub>                                 | <i>P2<sub>1</sub></i>          |                                                                    | [SbF <sub>3</sub> (NO <sub>3</sub> ) <sub>3</sub> ] <sup>3-</sup>                                                                                                                                  | SHG: 2.2 × KDP,<br>Eg(exp)= 3.75 eV,<br>Eg(cal)= 3.08 eV                                                        | 5  |

|                                                               |               |                                                |                                                                                                             |                                                                                                                                                    |    |
|---------------------------------------------------------------|---------------|------------------------------------------------|-------------------------------------------------------------------------------------------------------------|----------------------------------------------------------------------------------------------------------------------------------------------------|----|
| $\text{Cs}_8\text{Dy}_2\text{Ge}_{16}\text{O}_{38}\text{F}_2$ | <i>Pnn2</i>   |                                                | $[\text{Ge}_2\text{O}_7\text{F}]$                                                                           |                                                                                                                                                    | 51 |
| $\text{CsB}(\text{PO}_4)\text{F}$                             | <i>P2_13</i>  | $\text{K}_3\text{VO}_4(\text{cP32})$           | $[\text{PO}_4] [\text{BO}_3\text{F}]$                                                                       | SHG: $0.3 \times \text{KDP}$ ,                                                                                                                     | 52 |
| $\text{KYb}_2\text{F}_5(\text{SO}_4)$                         | <i>Pbcm</i>   | $\text{LaV}_2\text{O}_6\text{IO}_3$            | $[\text{YbO}_2\text{F}_6] [\text{SO}_4]$                                                                    | weak magnetic interaction between the neighboring $\text{Yb}^{3+}$ ions                                                                            | 53 |
| $\text{RbBi}_2(\text{SeO}_3)\text{F}_5$                       | <i>P-1</i>    |                                                | $[\text{BiO}_3\text{F}_5] [\text{SeO}_3]$                                                                   | $E_g(\text{exp}) = 4.18\text{eV}$                                                                                                                  | 54 |
| $\text{Pb}_3\text{B}_6\text{O}_{11}\text{F}_2$                | <i>P2_1</i>   | $\text{Ba}_3\text{B}_6\text{O}_{11}\text{F}_2$ | $[\text{Pb}_3\text{O}_x\text{F}_2 (x = 4, 5, 6), [\text{FPb}_3] \text{ layer}, [\text{BO}_4] [\text{BO}_3]$ | $E_g(\text{exp}) = 3.02\text{eV}$ ,<br>$E_g(\text{cal}) = 2.55\text{eV}$ , $d\Delta n = 0.071$ at $534\text{nm}$ , SHG: $\sim 4 \times \text{KDP}$ | 55 |
| $\text{PbB}_5\text{O}_8\text{F}$                              | <i>Pbca</i>   |                                                | $[\text{B}_5\text{O}_{10}\text{F}]^{6-}$                                                                    | $\Delta n = 0.0685$ at $1064\text{nm}$ ,<br>$\Delta n = 0.0737$ at $400\text{nm}$                                                                  | 56 |
| $\text{PbB}_2\text{O}_3\text{F}_2$                            | <i>P3_1m</i>  |                                                | $[\text{BO}_3\text{F}]$                                                                                     | SHG: $13 \times \text{KDP}$                                                                                                                        | 57 |
| $\text{SnB}_2\text{O}_3\text{F}_2$                            | <i>P3_1m</i>  |                                                | $[\text{BO}_3\text{F}]$                                                                                     | SHG: $4 \times \text{KDP}$                                                                                                                         | 58 |
| $\text{Pb}_8(\text{B}_9\text{O}_{21})\text{F}$                | <i>R-3cH</i>  |                                                | $[\text{B}_9\text{O}_{21}]^{15-} [\text{BO}_3]$                                                             | cutoff edge is about $276\text{nm}$                                                                                                                | 11 |
| $\text{Pb}_2\text{BO}_3\text{F}$                              | <i>P6_3/m</i> |                                                | $[\text{PbO}_3\text{F}_2] [\text{BO}_3]$                                                                    | melts congruently at $448^\circ\text{C}$                                                                                                           | 59 |
| $\text{Pb}_3\text{O}(\text{BO}_3)\text{F}$                    | <i>Pbcm</i>   |                                                | $[\text{PbO}_3\text{F}] [\text{PbO}_4] [\text{BO}_3]$                                                       |                                                                                                                                                    | 60 |

**Table S5.** Selected Oxysulfides and Oxyselenides with structural information and physical properties.

| Formula                                                                                                                                                                                                                                                                                                                                                                                   | Space Group    | Structure type                                                 | BBU's                                                                                                                            | Property                                                                                                                                                                                                                         | Ref |
|-------------------------------------------------------------------------------------------------------------------------------------------------------------------------------------------------------------------------------------------------------------------------------------------------------------------------------------------------------------------------------------------|----------------|----------------------------------------------------------------|----------------------------------------------------------------------------------------------------------------------------------|----------------------------------------------------------------------------------------------------------------------------------------------------------------------------------------------------------------------------------|-----|
| BiAgOSe                                                                                                                                                                                                                                                                                                                                                                                   | <i>P4/nmmZ</i> | CuHfSi <sub>2</sub>                                            | [Bi <sub>2</sub> O <sub>2</sub> ] <sup>2+</sup><br>[Ag <sub>2</sub> Se <sub>2</sub> ] <sup>2-</sup>                              | E(g)= 0.95 eV.<br>lower lattice thermal conductivities (0.61 W·m <sup>-1</sup> ·K <sup>-1</sup> at room temperature and 0.35 W·m <sup>-1</sup> ·K <sup>-1</sup> at 650 K                                                         | 61  |
| A <sub>2</sub> Mn(SeO <sub>4</sub> )F <sub>3</sub> (A = K, Rb, Cs)                                                                                                                                                                                                                                                                                                                        | <i>Pbcn</i>    |                                                                | $\infty$ [MnF <sub>3</sub> O <sub>2</sub> ] <sup>4-</sup><br>[SeO <sub>4</sub> ]                                                 |                                                                                                                                                                                                                                  | 62  |
| Ti <sub>4</sub> O(Se <sub>2</sub> ) <sub>4</sub> Br <sub>6</sub>                                                                                                                                                                                                                                                                                                                          | <i>P121/c1</i> |                                                                | [Ti <sub>4</sub> ( $\mu_4$ -O)] [Se <sub>2</sub> ] <sup>2-</sup>                                                                 | Raman band at 224 cm <sup>-1</sup>                                                                                                                                                                                               | 63  |
| Sr <sub>3-x</sub> Ca <sub>x</sub> Fe <sub>2</sub> O <sub>5</sub> Cu <sub>2</sub> Ch <sub>2</sub> (Ch= S, Se; x=1, 2)                                                                                                                                                                                                                                                                      | <i>I4/mmm</i>  |                                                                | [FeO <sub>5</sub> ][Cu <sub>2</sub> Ch <sub>2</sub> ]                                                                            |                                                                                                                                                                                                                                  | 64  |
| RETa <sub>2</sub> MgQB <sub>8</sub> O <sub>26</sub> (RE = Sm, Eu, Gd; Q = S, Se),<br>Eu <sub>6</sub> Ta <sub>2</sub> MgSB <sub>8</sub> O <sub>26</sub> (1)<br>Sm <sub>6</sub> Ta <sub>2</sub> MgSeB <sub>8</sub> O <sub>26</sub> (2)<br>Eu <sub>6</sub> Ta <sub>2</sub> MgSeB <sub>8</sub> O <sub>26</sub> (3),<br>Gd <sub>6</sub> Ta <sub>2</sub> MgSeB <sub>8</sub> O <sub>26</sub> (4) | <i>P-3</i>     |                                                                | [B <sub>4</sub> O <sub>10</sub> ] <sup>8-</sup><br>$\infty$ [Mg(TaB <sub>4</sub> O <sub>13</sub> ) <sub>2</sub> ] <sup>16-</sup> | E(g)= 3.62, 3.73, 3.56, and 3.79 eV (1-4)                                                                                                                                                                                        | 65  |
| A <sub>2</sub> F <sub>2</sub> Fe <sub>2</sub> OQ <sub>2</sub> (A=Sr, Ba; Q=S, Se)                                                                                                                                                                                                                                                                                                         | <i>I4/mmm</i>  | Fe <sub>2</sub> La <sub>2</sub> O <sub>3</sub> Se <sub>2</sub> | [Sr <sub>2</sub> F <sub>2</sub> ] [Sr <sub>n</sub> Se <sub>n+2</sub> ]                                                           | magnetic semiconductors that undergo a long-range antiferromagnetic ordering below 83.6-106.2 K                                                                                                                                  | 66  |
| YSeBO <sub>2</sub>                                                                                                                                                                                                                                                                                                                                                                        | <i>Cmc21</i>   |                                                                | [BO <sub>3</sub> ] <sup>3-</sup><br>[YO <sub>3</sub> Se <sub>4</sub> ] <sup>11-</sup>                                            | E(g)= 3.45 eV                                                                                                                                                                                                                    | 67  |
| LnCrSe <sub>2</sub> O (Ln = Ce-Nd)                                                                                                                                                                                                                                                                                                                                                        | <i>C12/m1</i>  | AgBi <sub>3</sub> S <sub>4</sub> Br <sub>2</sub>               | [Cr1Se6] <sup>9-</sup><br>[Cr <sub>2</sub> Se <sub>4</sub> O <sub>2</sub> ] <sup>9-</sup>                                        | LnCrSe <sub>2</sub> O (Ln = Ce-Nd) show antiferromagnetic ordering with T <sub>N</sub> = 125, 120, and 118 K, respectively. Heat capacity measurement for NdCrSe <sub>2</sub> O indicates that the Debye temperature is 278.4 K. | 68  |
| Ba <sub>2</sub> NiO <sub>2</sub> Ag <sub>2</sub> Se <sub>2</sub>                                                                                                                                                                                                                                                                                                                          | <i>I4/mmm</i>  |                                                                | [NiO <sub>2</sub> ] [Ag <sub>2</sub> Se <sub>2</sub> ]                                                                           | G type spin order at 130 K.                                                                                                                                                                                                      | 69  |

**Table S6.** Selected oxypnictides with structural information and physical properties.

| Formula                                                | Space Group                    | BBU's                                                                                                                      | Properties                                                    | Ref    |
|--------------------------------------------------------|--------------------------------|----------------------------------------------------------------------------------------------------------------------------|---------------------------------------------------------------|--------|
| $\text{Cu}_2(\text{PO}_4)\text{F}$                     | $C2/c$                         | Cu coordinated by four O and two F                                                                                         |                                                               | 70     |
| $\text{Te}_2\text{Se}_8(\text{AsF}_6)\cdot\text{SO}_2$ | $P2_1/c$                       | $[\text{Te}_2\text{Se}_8]^{2+}$ bicyclic cluster formed by six-membered ring fused with 8-membered ring.                   |                                                               | 71,72  |
| $\text{Cu}_2(\text{AsO}_4)\text{Cl}$                   | $P2_1/m$                       | Face sharing Cu-containing octahedra create infinite zigzag chains and corner sharing with As tetrahedra                   |                                                               | 73     |
| $\text{Eu}_4\text{As}_2\text{O}$                       | $I4/mmm$                       | $\text{La}_2\text{Sb}$ type with O atoms occupying octahedral holes, closely related to $\text{K}_2\text{NiF}_4$ structure |                                                               | 74     |
| $\text{LaFeAsO}_{1-x}\text{F}_x$                       | $Cmma$<br>$P4/nmm$             | Stacked $[\text{FeAs}_4]$ layers and $[\text{La}_4\text{O}]$ layers F-doped on O sites                                     | ion carrier / superconductivity                               | 75–78  |
| $\text{Pb}_5(\text{AsO}_4)_3\text{Cl}$                 | $P2_1$<br>$P2_1/b$<br>$P6_3/m$ | $[\text{AsO}_4]$ tetrahedra                                                                                                | monoclinic to hexagonal transformation through temperature    | 79–84  |
| $\text{PrFeAsO}$                                       | $P4/nmm$                       | Pr polyhedra, Fe polyhedra, As polyhedra, O tetrahedra                                                                     |                                                               | 85,86  |
| $(\text{SrF})_2\text{Ti}_2\text{As}_2\text{O}$         | $I4/mmm$                       | $[\text{Ti}_2\text{O}]$ square planar layer alternating with $[\text{Sr}_2\text{F}_2]$                                     | resistivity and susceptibility, thermoelectric power, CDW/SDW | 87     |
| $\text{LaNiOAs}$                                       | $P4/mmm$                       | Alternating $[\text{La-O}]$ and $[\text{Ni-As}]$ layers                                                                    | superconductor. Pauli paramagnetism                           | 88     |
| $\text{GdFeAsO}$                                       | $P4/nmm$<br>$Cmme$             | Alternating $[\text{As-Fe}]$ and $[\text{Gd-O}]$ layers                                                                    | Structural transition<br>magnetic transition                  | 9,86   |
| $\text{Ce}_9\text{Au}_{4.91}\text{As}_8\text{O}_6$     | $Pnmm$                         | $[\text{Au}_5\text{As}_8]$ , $[\text{Ce}_4\text{O}_3]_2$                                                                   |                                                               | 89     |
| $\text{SrOCuSbS}_2$                                    | $P2_1/m$                       | Infinite $[\text{Cu}_2\text{S}_6]$ chain linked $[\text{SbS}_4\text{O}]$ layers separated by Sr                            | photoelectric properties                                      | 90     |
| $\text{Sr}_2\text{Mn}_3\text{Sb}_2\text{O}_2$          | $I4/mmm$                       | $[\text{Mn}_2\text{Sb}_2]$ and $[\text{MnO}_2]$ layers separated by Sr cation                                              | magnetic properties                                           | 91     |
| $\text{Sm}_9\text{Sb}_5\text{O}_5$                     | $P4/n$                         | Double layer $[\text{SmSb}]$ and $[\text{SmO}_4]$ tetrahedra                                                               |                                                               | 92     |
| $\text{Ho}_8\text{Sb}_3\text{O}_8$                     | $C2/m$                         | $[\text{Ho}_4\text{O}]$ edge sharing tetrahedra                                                                            | electrical properties                                         | 93     |
| $\text{Eu}_5\text{Cd}_2\text{Sb}_5\text{O}$            | $Cmcm$                         | $[\text{CdSb}_4]$ tetrahedra corner sharing, forming pentagonal channels                                                   |                                                               | 94     |
| $\text{PbSbO}_2\text{Br}$                              | $I4/mmm$                       | $[\text{O-Pb/Sb}_4]$ tetrahedra                                                                                            | $E_g(\text{cal}) = 2.67 \text{ eV}$                           | 95     |
| $\text{Bi}_2(\text{BiPb})\text{WO}_8\text{Cl}$         | $P4$                           | $[\text{Bi}_2\text{O}_2]$ layers $[\text{WO}_6]$ octahedra $[\text{PbO}_4]$ tetrahedra                                     |                                                               | 96     |
| $\text{BiCuOSe}$                                       | $P4/nmm$                       | $[\text{Bi}_2\text{O}_2]$ layers $[\text{Cu}_2\text{Se}_2]$ layers                                                         |                                                               | 97–100 |



|                                                                                                                                          |                                |                                                                                                                                   |                                                   |         |
|------------------------------------------------------------------------------------------------------------------------------------------|--------------------------------|-----------------------------------------------------------------------------------------------------------------------------------|---------------------------------------------------|---------|
| Ca <sub>4</sub> P <sub>2</sub> O                                                                                                         | <i>I4/mmm</i>                  | P surrounded by nine Ca atoms (tetragonal antiprism distorted) O atoms fill octahedral holes                                      |                                                   | 101,102 |
| UCuPO                                                                                                                                    | <i>P4/nmm</i>                  | [U <sub>2</sub> O <sub>2</sub> ] and [Cu <sub>2</sub> P <sub>2</sub> ] layers                                                     | electrical resistivity<br>magnetic susceptibility | 103–105 |
| LaNiOP                                                                                                                                   | <i>P4/nmm</i>                  | Alternating stack [La-O] and [Ni-P] tetrahedra                                                                                    | Superconducting ~3K                               | 106,107 |
| ROTPn (R = La, Nd, Sm, Gd; T = Mn, Fe, Co, Ni, Cu; Pn = P, As, Sb)                                                                       | <i>P4/nmm</i>                  | [TPn] and [RO] layers                                                                                                             | superconducting                                   | 108–110 |
| REZnPO (RE=Y, La-Nd, Sm, Gd, Dy, Ho)                                                                                                     | <i>R-3m</i><br><i>P4/nmm</i>   | Alternate stacks of [RE-O] and [Zn-P]                                                                                             | magnetic, electronic, and optical properties      | 111     |
| LnRuPO (Ln=La-Nd, Sm, Gd)                                                                                                                | <i>P4/nmm</i>                  | Ln coordinated by four P and four O making square antiprism, [RuP <sub>4</sub> ] tetrahedra                                       |                                                   | 112     |
| Sr <sub>2</sub> CrO <sub>2</sub> Cr <sub>2</sub> As <sub>2</sub>                                                                         | <i>I4/mmm</i>                  | [CrO <sub>2</sub> ] sheets, [CrAs] layers                                                                                         | magnetic properties                               | 113,114 |
| Sr <sub>2</sub> CrO <sub>2</sub> Cr <sub>2</sub> OAs <sub>2</sub>                                                                        | <i>P4/mmm</i>                  | [CrO <sub>4</sub> As <sub>2</sub> ] and [CrO <sub>2</sub> As <sub>4</sub> ] octahedra, [Sr <sub>2</sub> CrO <sub>3</sub> ] layers | magnetic properties                               | 115     |
| Sr <sub>2</sub> M <sub>3</sub> As <sub>2</sub> O <sub>2</sub> (M <sub>3</sub> =Mn <sub>3</sub> , Mn <sub>2</sub> Cu, MnZn <sub>2</sub> ) | <i>I4/mmm</i>                  | [CuO <sub>2</sub> ] and [Cu/Mn-As] layers                                                                                         | magnetic and electronic properties                | 116     |
| Sr <sub>2</sub> CrO <sub>3</sub> FeAs                                                                                                    | <i>P4/nmm</i>                  | [FeAs] layers, perovskite-like [Sr <sub>2</sub> CrO <sub>3</sub> ] block                                                          | magnetic and electronic properties                | 117     |
| Ba <sub>2</sub> CrO <sub>3</sub> FeAs                                                                                                    | <i>P4/nmm</i>                  | [FeAs] layers, perovskite-like [Ba <sub>2</sub> CrO <sub>3</sub> ] block                                                          | magnetic and electronic properties                | 117     |
| A <sub>2</sub> MnZn <sub>2</sub> As <sub>2</sub> O <sub>2</sub> (A=Sr, Ba)                                                               | <i>I4/mmm</i><br><i>P4/nmm</i> | Square planar [MnO <sub>2</sub> ] [Zn <sub>2</sub> As <sub>2</sub> ] layers                                                       | magnetic                                          | 118     |
| Ba <sub>2</sub> Ti <sub>2</sub> Cr <sub>2</sub> As <sub>4</sub> O                                                                        | <i>I4/mmm</i>                  | [Ti <sub>2</sub> As <sub>2</sub> O] and [Cr <sub>2</sub> As <sub>2</sub> ] layers                                                 | magnetic properties AFM phase transition          | 15      |
| Ba <sub>2</sub> Ti <sub>2</sub> Fe <sub>2</sub> As <sub>4</sub> O                                                                        | <i>I4/mmm</i>                  | [Ti <sub>2</sub> O] sheets and [Fe <sub>2</sub> As <sub>2</sub> ]                                                                 | superconducting                                   | 119     |
| LaMnAsO                                                                                                                                  | <i>P4/nmm</i>                  | [Mn-As] and [La-O] layers                                                                                                         | Ca doping, antiferromagnetic ordering             | 120     |
| NdMnAsO                                                                                                                                  | <i>P4/nmm</i>                  | [Mn-As] and [Nd-O] layers                                                                                                         | Sr doping magnetic properties                     | 121     |
| NdFeAsO                                                                                                                                  | <i>P4/nmm</i>                  | [Fe-As] and [Nd-O] layers                                                                                                         | Pressure phase transition, superconducting        | 122     |
| U <sub>2</sub> Cu <sub>2</sub> As <sub>3</sub> O                                                                                         | <i>P4/nmm</i>                  | [Cu-As], [U-O] slab                                                                                                               | no properties                                     | 123     |
| Ti <sub>8</sub> BiO <sub>7</sub>                                                                                                         | <i>Cmmm</i>                    | [OTi <sub>4</sub> ] tetrahedra, [TiO <sub>4</sub> Bi <sub>2</sub> ] octahedra                                                     | electrical resistivity                            | 124     |
| (SrF) <sub>2</sub> Ti <sub>2</sub> Bi <sub>2</sub> O                                                                                     | <i>I4/mmm</i>                  | [Ti <sub>2</sub> O] plane, [Ti <sub>2</sub> Bi <sub>2</sub> O]                                                                    | superconductivity                                 | 13      |
| Ce <sub>2</sub> O <sub>2</sub> Bi                                                                                                        | <i>I4/mmm</i>                  | [Ce-O] layer                                                                                                                      | transport, magnetic properties                    | 125–127 |
| R <sub>2</sub> O <sub>2</sub> Bi (R=La, Ce, Pr, Nd, Sm, Eu, Gd, Ho, Er,                                                                  | <i>I4/mmm</i>                  | Bi <sup>2-</sup> square net [R <sub>2</sub> O <sub>2</sub> ] layer                                                                | magnetic properties                               | 128     |

|                                                                                |               |                                                                                              |                                    |         |
|--------------------------------------------------------------------------------|---------------|----------------------------------------------------------------------------------------------|------------------------------------|---------|
| Yb, Y)                                                                         |               |                                                                                              |                                    |         |
| Eu <sub>4</sub> Bi <sub>2</sub> O                                              | <i>I4/mmm</i> | [OEu <sub>6</sub> ] octahedra Bi coordinated by nine Eu atoms                                |                                    | 129     |
| Sm <sub>4</sub> Bi <sub>2</sub> O                                              | <i>I4/mmm</i> | [BiSm <sub>9</sub> ], [OSm <sub>6</sub> ] octahedra                                          |                                    | 130     |
| Ba <sub>2</sub> Cd <sub>2.13</sub> Bi <sub>3</sub> O                           | <i>I4/mmm</i> | [Ba-O] layer [Cd-Bi] layer                                                                   |                                    | 131     |
| Gd <sub>3</sub> BiO <sub>3</sub>                                               | <i>C2/m</i>   | [GdO <sub>4</sub> ] tetrahedra                                                               | thermoelectric properties          | 132     |
| Gd <sub>8</sub> Bi <sub>3</sub> O <sub>8</sub>                                 | <i>C2/m</i>   | [GdO <sub>4</sub> ] tetrahedra                                                               | thermoelectric properties          | 132     |
| A <sub>4</sub> X <sub>2</sub> O (A=Ca, Sr, Ba; X=Sb, P, As, Bi)                | <i>I4/mmm</i> | P surrounded by nine Ca atoms (tetragonal antiprism distorted) O atoms fill octahedral holes | electronic properties              | 133     |
| Ba <sub>3</sub> Sb <sub>2</sub> O                                              | <i>Pbam</i>   | [Sb <sub>2</sub> ] and O anions separated by Ba cations                                      |                                    | 134     |
| Ba <sub>3</sub> Sb <sub>4</sub> O                                              | <i>P-21/c</i> | [Ba-Sb] units and [OBa <sub>4</sub> ] tetrahedra                                             |                                    | 135     |
| KBa <sub>4</sub> Bi <sub>3</sub> O                                             | <i>I4/mcm</i> | [Bi <sub>2</sub> ] units                                                                     |                                    | 136,137 |
| CeZnPO                                                                         | <i>P4/nmm</i> | [Ce-O] and [Zn-P] layers                                                                     | phase transition                   | 138     |
| PrZnPO                                                                         | <i>R-3m</i>   | [Pr-O] and [Zn-P] layers                                                                     | phase transition                   | 138     |
| Ln <sub>3</sub> Cu <sub>4</sub> P <sub>4</sub> O <sub>2</sub> (Ln=La, Ce, Nd)  | <i>I4/mmm</i> | [Cu <sub>2</sub> P <sub>2</sub> ] layers [Ln <sub>2</sub> O <sub>2</sub> ] sheets            | electric and magnetic properties   | 139     |
| Sr <sub>2</sub> VFeAsO <sub>3</sub>                                            | <i>P4/nmm</i> | [FeAs] and [Sr <sub>2</sub> VO <sub>3</sub> ] layers                                         | superconductor                     | 140,141 |
| Sr <sub>3</sub> Sc <sub>2</sub> Fe <sub>2</sub> As <sub>2</sub> O <sub>5</sub> | <i>I4/mmm</i> | [FeAs] layer and [Sr <sub>3</sub> Sc <sub>2</sub> O <sub>5</sub> ] blocks                    | electric and magnetic properties   | 142     |
| Na <sub>2</sub> Ti <sub>2</sub> As <sub>2</sub> O                              | <i>I4/mmm</i> | [ONa <sub>2</sub> Ti <sub>4</sub> ] octahedra                                                |                                    | 143     |
| Sc <sub>4</sub> Yb <sub>4</sub> Sb <sub>4</sub> O                              | <i>I4/mmm</i> | [YbSb] double layer                                                                          |                                    | 144     |
| BaTi <sub>2</sub> Pn <sub>2</sub> O (Pn=As, Sb, Bi)                            | <i>P4/mmm</i> | [Ti <sub>2</sub> Pn <sub>2</sub> O] layers and Ba layers                                     | electronic and magnetic properties | 145-147 |
| Ba <sub>5</sub> Cd <sub>2</sub> Sb <sub>4</sub> O <sub>2</sub>                 | <i>C2/m</i>   | [CdSb <sub>4</sub> ] tetrahedra and [Ba-O] slabs                                             |                                    | 148     |
| Nd <sub>10</sub> Au <sub>3</sub> As <sub>8</sub> O <sub>10</sub>               | <i>I4/m</i>   | [NdO] layers and [Au <sub>3</sub> (As <sub>2</sub> ) <sub>4</sub> ] units                    | magnetic and electronic properties | 149     |
| Sm <sub>10</sub> Au <sub>3</sub> As <sub>8</sub> O <sub>10</sub>               | <i>I4/m</i>   | [SmO] layers and [Au <sub>3</sub> (As <sub>2</sub> ) <sub>4</sub> ] units                    | magnetic and electronic properties | 149     |
| HT/LT-Nd <sub>10</sub> Pd <sub>3</sub> As <sub>8</sub> O <sub>10</sub>         | <i>I4/m</i>   | [NdO] layers and [Pd <sub>3</sub> (As <sub>2</sub> ) <sub>4</sub> ] units                    | magnetic and electronic properties | 150     |
| Sm <sub>10</sub> Pd <sub>3</sub> As <sub>8</sub> O <sub>10</sub>               | <i>C2/c</i>   | [SmO] layers and [Pd <sub>3</sub> (As <sub>2</sub> ) <sub>4</sub> ] units                    | magnetic and electronic properties | 150     |
| RE <sub>2</sub> AuP <sub>2</sub> O (RE=La, Ce, Pr)                             | <i>C2/m</i>   | [La <sub>2</sub> O] chains [AuP <sub>2</sub> ] units                                         |                                    | 151,152 |

**Table S7.** Selected other heteroanionic combinations with structural information and physical properties (N-Cl, S-Cl, Se-Cl, P-Cl, P-Br, etc.).

| Compound | Space group | BBU | Property                             | Ref |
|----------|-------------|-----|--------------------------------------|-----|
| TiNCl    | <i>Pmmn</i> |     | E <sub>g</sub> (cal) = 0.63 eV       | 153 |
| LiTiNC   | <i>Pmmn</i> |     | T <sub>c</sub> = 16.5, fraction=0.5% | 153 |

|                                                           |                               |                           |                                                                                                                                                                                                                 |         |
|-----------------------------------------------------------|-------------------------------|---------------------------|-----------------------------------------------------------------------------------------------------------------------------------------------------------------------------------------------------------------|---------|
| $\text{Na}_{0.22}\text{TiNCl}_{0.98}$                     | <i>Bmmb</i>                   |                           | $\text{A}_x\text{TiNCl}$ also became superconductors with much higher $T_c$ s of $\sim 16.3$ K. Fraction = 13.3%                                                                                                | 153     |
| $\text{K}_{0.22}\text{TiNCl}_{0.90}$                      | <i>Immm</i>                   |                           | $\text{A}_x\text{TiNCl}$ also became superconductors with much higher $T_c$ s of $\sim 16.3$ K. Fraction = 31.0%                                                                                                | 153     |
| $\text{Rb}_{0.19}\text{TiNCl}_{0.75}$                     | <i>Immm</i>                   |                           | $\text{A}_x\text{TiNCl}$ also became superconductors with much higher $T_c$ s of $\sim 16.3$ K. Fraction = 4.3%                                                                                                 | 153     |
| $\text{Li}_x\text{ZrNCl}$                                 | <i>R-3mH</i>                  |                           | Black crystal. The structural transformation by Li intercalation is interpreted as the sliding of $[\text{ZrNCl}]_2$ slabs due to an electrostatic force. $T_c = 12.5$ K                                        | 154     |
| $\beta\text{-ZrNCl}$                                      | <i>R<math>\bar{3}m</math></i> |                           | pale yellow-green; $E_g \sim 3$ eV                                                                                                                                                                              | 155,156 |
| $\text{ThNCl}$                                            | <i>P4/nmm</i>                 |                           | $E_g$ (exp) = 3.79 eV                                                                                                                                                                                           | 157     |
| $\beta\text{-HfNCl}$                                      | <i>R-3mH</i>                  |                           | $T_c = 25.5$ K                                                                                                                                                                                                  | 158     |
| $\text{MoNCl}_3$                                          | <i>P-1</i>                    |                           |                                                                                                                                                                                                                 | 159     |
| $\text{Zn}_2\text{NCl}$                                   | <i>Pna21</i>                  |                           | mid-IR NLO, $E_g = 3.21$ eV, LDT = $20.7 \times \text{AGS}$ , SHG = $0.9 \times \text{AGS}$                                                                                                                     | 10      |
| $\text{Ba}_{15}\text{Ta}_{15}\text{N}_{33.66}\text{Cl}_4$ | <i>P-62c</i>                  | $\text{TaN}_4$ tetrahedra |                                                                                                                                                                                                                 | 160     |
| $\text{Zn}_7(\text{P}_{12}\text{N}_{24})\text{Cl}_2$      | <i>I-43m</i>                  | $\text{PN}_4$ tetrahedra  | $[\text{P}_{12}\text{N}_{24}]$ -Gerüst ist aus $[\text{P}_4\text{N}_4]$ - und $[\text{P}_6\text{N}_6]$ -Ringen                                                                                                  | 161     |
| $\text{W}_6\text{PCl}_{17}$                               | <i>Imm2</i>                   |                           | phosphorus-centered hexanuclear tungsten cluster, $(\text{W}_6\text{PCl}_{11})\text{Cl}_4^a\text{Cl}_{4/2}^{a-a}$ chains form a hexagonal stick packing structure                                               | 162     |
| $\text{W}_4(\text{PCl})\text{Cl}_{10}$                    | <i>C12/m1</i>                 |                           | Jahn–Teller distorted tetranuclear tungsten cluster that is interconnected into a layered $[\text{W}_4(\mu_4\text{-PCl})\text{Cl}_6^i\text{Cl}_{8/2}^{a-a}]$ structure containing a chlorophosphinidene ligand. | 162     |
| $\text{Sr}_3\text{P}_5\text{N}_{10}\text{Cl}$             | <i>Pnma</i>                   |                           | Excitation with UV to blue light ( $\lambda_{\text{exc}} = 420$ nm) induces natural-white                                                                                                                       | 162     |

|                                                   |               |                                                                                                                                             |                                                                                                                                                                                                                                                                                                                                  |         |
|---------------------------------------------------|---------------|---------------------------------------------------------------------------------------------------------------------------------------------|----------------------------------------------------------------------------------------------------------------------------------------------------------------------------------------------------------------------------------------------------------------------------------------------------------------------------------|---------|
|                                                   |               |                                                                                                                                             | (Ba <sub>3</sub> P <sub>5</sub> N <sub>10</sub> Br:Eu <sup>2+</sup> ), orange<br>(Ba <sub>3</sub> P <sub>5</sub> N <sub>10</sub> Cl:Eu <sup>2+</sup> ), and deep-red emission<br>(Sr <sub>3</sub> P <sub>5</sub> N <sub>10</sub> X:Eu <sup>2+</sup> )                                                                            |         |
| Sr <sub>3</sub> P <sub>5</sub> N <sub>10</sub> Br |               |                                                                                                                                             | Excitation with UV to blue light ( $\lambda_{exc}=420$ nm) induces natural-white (Ba <sub>3</sub> P <sub>5</sub> N <sub>10</sub> Br:Eu <sup>2+</sup> ), orange (Ba <sub>3</sub> P <sub>5</sub> N <sub>10</sub> Cl:Eu <sup>2+</sup> ), and deep-red emission (Sr <sub>3</sub> P <sub>5</sub> N <sub>10</sub> X:Eu <sup>2+</sup> ) | 162     |
| Ba <sub>3</sub> P <sub>5</sub> N <sub>10</sub> Cl |               |                                                                                                                                             | Excitation with UV to blue light ( $\lambda_{exc}=420$ nm) induces natural-white (Ba <sub>3</sub> P <sub>5</sub> N <sub>10</sub> Br:Eu <sup>2+</sup> ), orange (Ba <sub>3</sub> P <sub>5</sub> N <sub>10</sub> Cl:Eu <sup>2+</sup> ), and deep-red emission (Sr <sub>3</sub> P <sub>5</sub> N <sub>10</sub> X:Eu <sup>2+</sup> ) | 162     |
| Ba <sub>3</sub> P <sub>5</sub> N <sub>10</sub> Br |               |                                                                                                                                             | Excitation with UV to blue light ( $\lambda_{exc}=420$ nm) induces natural-white (Ba <sub>3</sub> P <sub>5</sub> N <sub>10</sub> Br:Eu <sup>2+</sup> ), orange (Ba <sub>3</sub> P <sub>5</sub> N <sub>10</sub> Cl:Eu <sup>2+</sup> ), and deep-red emission (Sr <sub>3</sub> P <sub>5</sub> N <sub>10</sub> X:Eu <sup>2+</sup> ) | 162     |
| Sr <sub>2</sub> P <sub>7</sub> Cl                 | <i>C12/c1</i> | heptaphosphanortricyclane P <sub>7</sub> <sup>3-</sup> clusters                                                                             | all electron-balanced wide band gap semiconductors, E <sub>g</sub> = 1.9eV                                                                                                                                                                                                                                                       | 163     |
| Sr <sub>2</sub> P <sub>7</sub> Br                 | <i>P21/3</i>  |                                                                                                                                             | E <sub>g</sub> = 2.1 eV                                                                                                                                                                                                                                                                                                          | 163     |
| P <sub>6</sub> N <sub>7</sub> Cl <sub>9</sub>     | <i>C12/c1</i> | a non-planar condensed ring structure                                                                                                       |                                                                                                                                                                                                                                                                                                                                  | 164     |
| P <sub>2</sub> B <sub>4</sub> Cl <sub>4</sub>     | <i>Pbna</i>   |                                                                                                                                             |                                                                                                                                                                                                                                                                                                                                  | 165     |
| PCl <sub>5</sub> TaCl <sub>5</sub>                | <i>P-1</i>    | tetrahedral cations PCl <sub>4</sub> <sup>+</sup> , and octahedral anions NbCl <sub>6</sub> <sup>-</sup> and TaCl <sub>6</sub> <sup>-</sup> |                                                                                                                                                                                                                                                                                                                                  | 166     |
| PCl <sub>5</sub> NbCl <sub>5</sub>                | <i>P-1</i>    |                                                                                                                                             |                                                                                                                                                                                                                                                                                                                                  | 166     |
| PCl <sub>4</sub> TeCl <sub>5</sub>                | <i>I2mb</i>   |                                                                                                                                             | tetrahedral [PCl <sub>4</sub> ] <sup>+</sup> cations and polymeric infinite chain anions [TeCl <sub>5</sub> ] <sub>n</sub> <sup>n-</sup>                                                                                                                                                                                         | 167     |
| PCl <sub>4</sub> SnCl <sub>5</sub>                | <i>Cmma</i>   |                                                                                                                                             |                                                                                                                                                                                                                                                                                                                                  | 168     |
| Li <sub>6</sub> PS <sub>5</sub> Cl                | <i>F-43m</i>  |                                                                                                                                             | S <sup>2-</sup> anions in half of the tetrahedral voids and PS <sub>4</sub> <sup>3-</sup> tetrahedra on the                                                                                                                                                                                                                      | 169,170 |

|                                                     |                |                                                                                                                                                                                                     |                                                                                                                                                                                                                                                                                                                                                               |         |
|-----------------------------------------------------|----------------|-----------------------------------------------------------------------------------------------------------------------------------------------------------------------------------------------------|---------------------------------------------------------------------------------------------------------------------------------------------------------------------------------------------------------------------------------------------------------------------------------------------------------------------------------------------------------------|---------|
|                                                     |                |                                                                                                                                                                                                     | octahedral sites<br>the effect of lattice<br>polarizability on the<br>ionic conductivity                                                                                                                                                                                                                                                                      |         |
| Hg <sub>2</sub> PCl <sub>2</sub>                    | <i>I12/m1</i>  | (P <sub>2</sub> Hg <sub>6</sub> ) Octahedron                                                                                                                                                        | Hg <sub>6</sub> octahedron centered<br>with a P <sub>2</sub> <sup>4-</sup> dumbbell                                                                                                                                                                                                                                                                           | 171     |
| La <sub>3</sub> Zn <sub>4</sub> P <sub>6</sub> Cl   | <i>Cmcm</i>    | two-dimensional ∞ <sub>2</sub> [Zn <sub>4</sub> P <sub>6</sub> ] <sup>8-</sup><br>layers separated by one-<br>dimensional ∞ <sub>1</sub> [Cl <sub>2</sub> La <sub>3</sub> ] <sup>8+</sup><br>chains | Semiconductors, E <sub>g</sub> =<br>0.45 eV                                                                                                                                                                                                                                                                                                                   | 172     |
| Hg <sub>6</sub> SnP <sub>4</sub> Cl <sub>6</sub>    | <i>P213</i>    | [Hg <sub>6</sub> P <sub>4</sub> Cl <sub>3</sub> ] <sup>+</sup> (SnCl <sub>3</sub> ) <sup>-</sup>                                                                                                    | Supramolecular<br>inorganic compound                                                                                                                                                                                                                                                                                                                          | 173     |
| (NPBr <sub>2</sub> ) <sub>3</sub>                   | <i>Pcmn</i>    |                                                                                                                                                                                                     |                                                                                                                                                                                                                                                                                                                                                               | 174     |
| Ge <sub>38</sub> P <sub>8</sub> Br <sub>8</sub>     | <i>P-43n</i>   |                                                                                                                                                                                                     |                                                                                                                                                                                                                                                                                                                                                               | 175     |
| La <sub>2</sub> Br <sub>2</sub> P                   | <i>P-3m1</i>   |                                                                                                                                                                                                     | Phosphide Halides;<br>Structure X-M-Z-M-X in<br>M <sub>2</sub> X <sub>2</sub> Z                                                                                                                                                                                                                                                                               | 176     |
| Sn <sub>24</sub> P <sub>19.60</sub> Br <sub>8</sub> | <i>Pm-3 n</i>  |                                                                                                                                                                                                     | cationic clathrate. The<br>Sn(1) is tetrahedrally<br>coordinated by three<br>phosphorus atoms and<br>one tin atom, Sn(2). The<br>halogen atoms are<br>trapped in the cavities of<br>the clathrate framework.<br>Two types of the<br>cavities: the pentagonal<br>dodecahedral and the<br>tetrakaidecahedral,<br>which occur in a 2:6 ratio<br>in the unit cell | 177     |
| Zn <sub>6</sub> S <sub>5</sub> Cl <sub>2</sub>      | <i>Cmcm</i>    | 1-D tunnel-like structure                                                                                                                                                                           | Ten zinc atoms and ten<br>sulfur atoms interconnect<br>to each other to form a<br>cubane-like structure. E <sub>g</sub><br>(exp) = 2.71 eV                                                                                                                                                                                                                    | 6       |
| Hg <sub>3</sub> ZnS <sub>2</sub> Cl <sub>4</sub>    | <i>P63mc</i>   |                                                                                                                                                                                                     | 2-D layered structure<br>which contains<br>interconnected 12-<br>membered Hg <sub>6</sub> S <sub>3</sub> Cl <sub>3</sub><br>rings with chair-like<br>conformation, and the<br>layers sandwich the<br>ZnS <sub>2</sub> Cl <sub>2</sub> tetrahedra. E <sub>g</sub><br>(exp) = 2.65 eV                                                                           | 6       |
| WSCl <sub>4</sub>                                   | <i>P121/c1</i> |                                                                                                                                                                                                     | The arrangement of the<br>five ligands around the<br>tungsten atom may be<br>regarded as a regular<br>square pyramid, with                                                                                                                                                                                                                                    | 178,179 |

|                                                                               |              |                                                                |                                                                                                                                                                             |     |
|-------------------------------------------------------------------------------|--------------|----------------------------------------------------------------|-----------------------------------------------------------------------------------------------------------------------------------------------------------------------------|-----|
|                                                                               |              |                                                                | sulfur atom in the unique position.                                                                                                                                         |     |
| Pb <sub>3</sub> S <sub>2</sub> Cl <sub>2</sub>                                | <i>I-43d</i> |                                                                | Narrow size distribution and size tunability over the range 7 to ~30 nm, E <sub>g</sub> (cal) = 2.02 eV                                                                     | 180 |
| Li <sub>15</sub> P <sub>4</sub> S <sub>16</sub> Cl <sub>3</sub>               | <i>I-43d</i> | PS <sub>4</sub> , LiS <sub>4</sub> , and Li(S <sub>3</sub> Cl) | Solid-State Ionic Conductor                                                                                                                                                 | 181 |
| Ta <sub>3</sub> SBr <sub>7</sub>                                              | <i>C1m1</i>  |                                                                |                                                                                                                                                                             | 182 |
| Ge <sub>4</sub> S <sub>6</sub> Br <sub>4</sub>                                | <i>P-1</i>   |                                                                |                                                                                                                                                                             | 183 |
| Ag <sub>3</sub> SBr                                                           | <i>Pm-3m</i> |                                                                | The directions of Ag motion with large amplitude are nearly toward four face centers of a distorted S and Br tetrahedron. Phase transition beta-gamma. Superionic conductor | 184 |
| K <sub>2</sub> Ba <sub>3</sub> Ge <sub>3</sub> S <sub>9</sub> Cl <sub>2</sub> | <i>P63</i>   | distorted [GeS <sub>4</sub> ] <sup>4-</sup> tetrahedra         | E <sub>g</sub> = 3.69 eV LIDT intensity (28.8 × AGS) SHG response (0.34 × AGS)                                                                                              | 185 |
| Ag <sub>6</sub> SnS <sub>4</sub> Br <sub>2</sub>                              | <i>Pnma</i>  |                                                                |                                                                                                                                                                             | 186 |
| As <sub>4</sub> S <sub>3</sub> (CuCl)                                         | <i>Pbcm</i>  |                                                                | Supramolecular                                                                                                                                                              | 187 |
| Ba <sub>3</sub> GaS <sub>4</sub> Cl                                           | <i>Pnma</i>  | BaX pseudolayers and isolated GaQ <sub>4</sub> tetrahedra      | E <sub>g</sub> = 2.14 eV                                                                                                                                                    | 188 |
| Ba <sub>3</sub> KSb <sub>4</sub> S <sub>9</sub> Cl                            | <i>Pnnm</i>  |                                                                | E <sub>g</sub> = 1.99 eV                                                                                                                                                    | 189 |

#### References:

- 1 K. Li, A. Yalikhun and Z. Su, *Dalton Trans.*, 2020, **49**, 8985–8990.
- 2 W. Jeitschko, T. A. Bither and P. E. Bierstedt, *Acta Crystallogr. B*, 1977, **33**, 2767–2775.
- 3 S. Shi, C. Lin, G. Yang, L. Cao, B. Li, T. Yan, M. Luo and N. Ye, *Chem. Mater.*, 2020, **32**, 7958–7964.
- 4 J. Y. Chung, H. Jo, S. Yeon, H. R. Byun, T.-S. You, J. I. Jang and K. M. Ok, *Chem. Mater.*, 2020, **32**, 7318–7326.
- 5 L. Wang, F. Yang, X. Zhao, L. Huang, D. Gao, J. Bi, X. Wang and G. Zou, *Dalton Trans.*, 2019, **48**, 15144–15150.
- 6 W.-T. Chen, H.-M. Kuang and H.-L. Chen, *J. Solid State Chem.*, 2010, **183**, 2411–2415.

- 7 Y. Chi, H.-G. Xue and S.-P. Guo, *Inorg. Chem.*, 2020, **59**, 1547–1555.
- 8 W. Zhou, W.-D. Yao, R.-L. Tang, H. Xue and S.-P. Guo, *J. Alloys Compd.*, 2021, **867**, 158879.
- 9 F. Nitsche, Th. Doert and M. Ruck, *Solid State Sci.*, 2013, **19**, 162–166.
- 10 X. Zhao, C. Lin, J. Chen, M. Luo, F. Xu, S. Yang, S. Shi, B. Li and N. Ye, *Chem. Mater.*, 2021, **33**, 1462–1470.
- 11 W. Zhao, S. Pan, J. Han, Z. Zhou, X. Tian and J. Li, *Inorg. Chem. Commun.*, 2011, **14**, 566–568.
- 12 M. Cheng, W. Jin, Z. Yang and S. Pan, *Inorg. Chem.*, 2020, **59**, 13014–13018.
- 13 T. Yajima, K. Nakano, F. Takeiri, J. Hester, T. Yamamoto, Y. Kobayashi, N. Tsuji, J. Kim, A. Fujiwara and H. Kageyama, *J. Phys. Soc. Jpn.*, 2013, **82**, 013703.
- 14 Q. Dong, P. Xiong, J. Yang, Y. Fu, W. Chen, F. Yang, Z. Ma and M. Peng, *J. Alloys Compd.*, 2021, **885**, 160960.
- 15 A. Ablimit, Y.-L. Sun, H. Jiang, J.-K. Bao, H.-F. Zhai, Z.-T. Tang, Y. Liu, Z.-C. Wang, C.-M. Feng and G.-H. Cao, *J. Alloys Compd.*, 2017, **694**, 1149–1153.
- 16 Z. Žák and M. Kosička, *Acta Crystallogr. B*, 1978, **34**, 38–40.
- 17 H. B. Yahia, M. Shikano, S. Koike, K. Tatsumi, H. Kobayashi, H. Kawaji, M. Avdeev, W. Müller, C. D. Ling, J. Liu and M.-H. Whangbo, *Inorg. Chem.*, 2012, **51**, 8729–8738.
- 18 R. Guo, X. Liu, C. Tao, C. Tang, M. Xia, L. Liu, Z. Lin and X. Wang, *Dalton Trans.*, 2021, **50**, 2138–2142.
- 19 L. Lin, X. Jiang, C. Wu, Z. Lin, Z. Huang, M. G. Humphrey and C. Zhang, *Dalton Trans.*, 2021, **50**, 7238–7245.
- 20 X. Huang, M. Zhang, J. Li, Z. Zhao and Z. He, *J. Solid State Chem.*, 2021, **294**, 121822.
- 21 C. Kutahyali Aslani, V. V. Klepov and H.-C. zur Loye, *J. Solid State Chem.*, 2021, **294**, 121833.
- 22 S. C. Manna, P. Sandineni and A. Choudhury, *J. Solid State Chem.*, 2021, **295**, 121922.
- 23 Y. Chen, W. Zhang, D. An, M. Abudourehman, Z. Chen and H. Mi, *Eur. J. Inorg. Chem.*, 2021, **2021**, 1117–1121.
- 24 B. Scheibe, A. J. Karttunen, F. Weigend and F. Kraus, *Chem. – Eur. J.*, 2021, **27**, 2381–2392.
- 25 S. Novikov, R. Bagum, Z. B. Yan, J. P. Clancy and Y. Mozharivskyj, *J. Solid State Chem.*, 2021, **293**, 121741.
- 26 C. Wu, L. Li, L. Lin, Z. Huang, M. G. Humphrey and C. Zhang, *Chem. Mater.*, 2020, **32**, 3043–3053.
- 27 J. C. Hancock, M. L. Nisbet, W. Zhang, P. S. Halasyamani and K. R. Poeppelmeier, *J. Am. Chem. Soc.*, 2020, **142**, 6375–6380.
- 28 Q. Ding, X. Liu, S. Zhao, Y. Wang, Y. Li, L. Li, S. Liu, Z. Lin, M. Hong and J. Luo, *J. Am. Chem. Soc.*, 2020, **142**, 6472–6476.

- 29 M. Ding, J. Xu, H. Wu, H. Yu, Z. Hu, J. Wang and Y. Wu, *Dalton Trans.*, 2020, **49**, 12184–12188.
- 30 W. Zhang, Z. Wei, Z. Yang and S. Pan, *Dalton Trans.*, 2020, **49**, 11591–11596.
- 31 C. Wu, X. Jiang, L. Lin, Z. Lin, Z. Huang, M. G. Humphrey and C. Zhang, *Chem. Mater.*, 2020, **32**, 6906–6915.
- 32 W. Zhang, W. Jin, Z. Yang and S. Pan, *Dalton Trans.*, 2020, **49**, 17658–17664.
- 33 M.-L. Liang, Y.-X. Ma, C.-L. Hu, F. Kong and J.-G. Mao, *Chem. Mater.*, 2020, **32**, 9688–9695.
- 34 L. Lin, X. Jiang, C. Wu, L. Li, Z. Lin, Z. Huang, M. G. Humphrey and C. Zhang, *ACS Appl. Mater. Interfaces*, 2020, **12**, 49812–49821.
- 35 M. A. Kirsanova, A. S. Akmaev, D. A. Aksyonov, S. V. Ryazantsev, V. A. Nikitina, D. S. Filimonov, M. Avdeev and A. M. Abakumov, *Inorg. Chem.*, 2020, **59**, 16225–16237.
- 36 J. Zhou, Y. Liu, H. Wu, H. Yu, Z. Lin, Z. Hu, J. Wang and Y. Wu, *Angew. Chem. Int. Ed.*, 2020, **59**, 19006–19010.
- 37 Y. Deng, L. Huang, X. Dong, L. Wang, K. M. Ok, H. Zeng, Z. Lin and G. Zou, *Angew. Chem. Int. Ed.*, 2020, **59**, 21151–21156.
- 38 R. C. Vincent, P. Vishnoi, M. B. Preefer, J.-X. Shen, F. Seeler, K. A. Persson and R. Seshadri, *ACS Appl. Mater. Interfaces*, 2020, **12**, 48662–48668.
- 39 R. E. Stene, B. Scheibe, A. J. Karttunen, W. Petry and F. Kraus, *Eur. J. Inorg. Chem.*, 2020, **2020**, 2260–2269.
- 40 P.-F. Li, F. Kong and J.-G. Mao, *J. Solid State Chem.*, 2020, **286**, 121288.
- 41 Y. Xie, Z. He, W. Zhang, Z. Zhao, M. Zhang and X. Huang, *J. Solid State Chem.*, 2020, **286**, 121315.
- 42 C. Stoll, M. Seibald, D. Baumann and H. Huppertz, *Z. Für Naturforschung B*, 2020, **75**, 833–841.
- 43 C. Stoll, M. Seibald and H. Huppertz, *Z. Für Naturforschung B*, 2020, **75**, 83–90.
- 44 M. Shang and P. S. Halasyamani, *J. Solid State Chem.*, 2020, **282**, 121121.
- 45 T. Shi, F. Zhang, Y. Li, L. Gao, Z. Yang and S. Pan, *Inorg. Chem.*, 2020, **59**, 3034–3041.
- 46 Y. Wang, J. Han, J. Huang, Z. Yang and S. Pan, *Inorg. Chem.*, 2020, **59**, 810–817.
- 47 S. Han, M. Mutailipu, A. Tudi, Z. Yang and S. Pan, *Chem. Mater.*, 2020, **32**, 2172–2179.
- 48 H. Grossholz, C. Buyer, S. M. A. Lotter, S. Wolf and T. Schleid, *Z. Für Anorg. Allg. Chem.*, 2020, **646**, 1588–1594.
- 49 J. T. Goettel, M. R. Bortolus, D. G. Stuart, H. P. A. Mercier and G. J. Schrobilgen, *Chem. – Eur. J.*, 2019, **25**, 15815–15829.
- 50 R. E. Stene, B. Scheibe, A. J. Karttunen, W. Petry and F. Kraus, *Eur. J. Inorg. Chem.*, 2019, **2019**, 3672–3682.



- 51 G. Morrison, B. O. Wilkins, N. R. Spagnuolo, M. D. Smith and H.-C. zur Loye, *J. Solid State Chem.*, 2019, **269**, 51–55.
- 52 Q. Ding, S. Zhao, L. Li, Y. Shen, P. Shan, Z. Wu, X. Li, Y. Li, S. Liu and J. Luo, *Inorg. Chem.*, 2019, **58**, 1733–1737.
- 53 N. Jiang and H. S. La Pierre, *Inorg. Chem.*, 2019, **58**, 12152–12156.
- 54 S. Shi, M. Luo, C. Lin and N. Ye, *Dalton Trans.*, 2018, **47**, 6598–6604.
- 55 H. Li, H. Wu, X. Su, H. Yu, S. Pan, Z. Yang, Y. Lu, J. Han and K. R. Poeppelmeier, *J. Mater. Chem. C*, 2014, **2**, 1704–1710.
- 56 M. Mutailipu, M. Zhang, B. Zhang, Z. Yang and S. Pan, *Chem. Commun.*, 2018, **54**, 6308–6311.
- 57 M. Luo, F. Liang, Y. Song, D. Zhao, N. Ye and Z. Lin, *J. Am. Chem. Soc.*, 2018, **140**, 6814–6817.
- 58 S. G. Jantz, M. Dialer, L. Bayarjargal, B. Winkler, L. van Wüllen, F. Pielnhöfer, J. Brgoch, R. Wehrich and H. A. Höpfe, *Adv. Opt. Mater.*, 2018, **6**, 1800497.
- 59 W. Zhao, S. Pan, J. Han, J. Yao, Y. Yang, J. Li, M. Zhang, L. H. Zhang and Y. Hang, *J. Solid State Chem.*, 2011, **184**, 2849–2853.
- 60 W. Zhao, S. Pan, X. Dong, J. Li, X. Tian, X. Fan, Z. Chen and F. Zhang, *Mater. Res. Bull.*, 2012, **47**, 947–951.
- 61 C. Zhang, J. He, R. McClain, H. Xie, S. Cai, L. N. Walters, J. Shen, F. Ding, X. Zhou, C. D. Malliakas, J. M. Rondinelli, M. G. Kanatzidis, C. Wolverton, V. P. Dravid and K. R. Poeppelmeier, *J. Am. Chem. Soc.*, 2022, **144**, 2569–2579.
- 62 T. Zhu, S. Lee, X. Zhang, H. Yang, Y. Jin, Y. Jin, K.-Y. Choi and M. Lü, *Inorg. Chem.*, 2021, **60**, 13707–13717.
- 63 P. Poltarak, V. Komarov, Y. Gayfulin, S. Artemkina and V. Fedorov, *Z. Für Anorg. Allg. Chem.*, 2021, **647**, 1729–1734.
- 64 B. C. Sheath, S. J. Cassidy and S. J. Clarke, *J. Solid State Chem.*, 2021, **293**, 121761.
- 65 Z.-H. Shi, Y. Chi, M. Yang, W. Liu and S.-P. Guo, *Inorg. Chem.*, 2020, **59**, 3532–3536.
- 66 H. Kabbour, E. Janod, B. Corraze, M. Danot, C. Lee, M.-H. Whangbo and L. Cario, *J. Am. Chem. Soc.*, 2008, **130**, 8261–8270.
- 67 Z.-T. Lu, W.-J. Fan, Z.-Q. Wang, N. Gu, Z.-H. Yue, H.-G. Xue and S.-P. Guo, *Inorg. Chem.*, 2020, **59**, 7905–7909.
- 68 X. Zhang, Y. Xiao, R. Wang, He, D. Wang, K. Bu, G. Mu and F. Huang, *Inorg. Chem.* 2019, **58**, 14, 9482–9489
- 69 Y. Matsumoto, T. Yamamoto, K. Nakano, H. Takatsu, T. Murakami, K. Hongo, R. Maezono, H. Ogino, D. Song, C. M. Brown, C. Tassel and H. Kageyama, *Angew. Chem. Int. Ed.*, 2019, **58**, 756–759.
- 70 J. R. Rea and E. Kostiner, *Acta Crystallogr. B*, 1976, **32**, 1944–1947.

- 71 M. J. Collins, R. J. Gillespie and J. F. Sawyer, *Inorg. Chem.*, 1987, **26**, 1476–1481.
- 72 P. Boldrini, I. D. Brown, R. J. Gillespie, P. R. Ireland, W. Luk, D. R. Slim and J. E. Vekris, *Inorg. Chem.*, 1976, **15**, 765–770.
- 73 J. R. Rea, J. B. Anderson and E. Kostiner, *Acta Crystallogr. B*, 1977, **33**, 975–979.
- 74 Y. Wang, L. D. Calvert, E. J. Gabe and J. B. Taylor, *Acta Crystallogr. B*, 1977, **33**, 3122–3125.
- 75 R. Frankovsky, A. Marchuk, R. Pobel and D. Johrendt, *Solid State Commun.*, 2012, **152**, 632–634.
- 76 J. Karpinski, N. D. Zhigadlo, S. Katrych, Z. Bukowski, P. Moll, S. Weyeneth, H. Keller, R. Puzniak, M. Tortello, D. Daghero, R. Gonnelli, I. Maggio-Aprile, Y. Fasano, Ø. Fischer, K. Rogacki and B. Batlogg, *Phys. C Supercond.*, 2009, **469**, 370–380.
- 77 N. Qureshi, Y. Drees, J. Werner, S. Wurmehl, C. Hess, R. Klingeler, B. Büchner, M. T. Fernández-Díaz and M. Braden, *Phys. Rev. B*, 2010, **82**, 184521.
- 78 J. Kim, A. Fujiwara, T. Sawada, Y. Kim, K. Sugimoto, K. Kato, H. Tanaka, M. Ishikado, S. Shamoto and M. Takata, *IUCrJ*, 2014, **1**, 155–159.
- 79 G. Cametti, M. Nagashima and S. V. Churakov, *Acta Crystallogr. Sect. B Struct. Sci. Cryst. Eng. Mater.*, 2022, **78**, 618–626.
- 80 H. Okudera, *Am. Mineral.*, 2013, **98**, 1573–1579.
- 81 J. Sejkora, J. Plasil, I. Cisarova, R. Skoda, J. Hlousek, F. Veselovsky and I. Jebava, *J. Geosci.*, 2011, **56**, 257–271.
- 82 J. Flis, O. Borkiewicz, T. Bajda, M. Manecki and J. Klasa, *J. Synchrotron Radiat.*, 2010, **17**, 207–214.
- 83 Z. Yang, K. Ding, J. de Fourestier and H. Li, *Neues Jahrb. Für Mineral. - Abh.*, 2013, 229–235.
- 84 H. Effenberger and F. Pertlik, *Mineral. Petrol.*, 1979, **26**, 95–107.
- 85 P. Quebe, L. J. Terbüchte and W. Jeitschko, *J. Alloys Compd.*, 2000, **302**, 70–74.
- 86 F. Nitsche, A. Jesche, E. Hieckmann, Th. Doert and M. Ruck, *Phys. Rev. B*, 2010, **82**, 134514.
- 87 R. H. Liu, Y. A. Song, Q. J. Li, J. J. Ying, Y. J. Yan, Y. He and X. H. Chen, *Chem. Mater.*, 2010, **22**, 1503–1508.
- 88 T. Watanabe, H. Yanagi, Y. Kamihara, T. Kamiya, M. Hirano and H. Hosono, *J. Solid State Chem.*, 2008, **181**, 2117–2120.
- 89 T. Bartsch, R.-D. Hoffmann and R. Pöttgen, *Z. Für Naturforschung B*, 2016, **71**, 1245–1252.
- 90 K. Bu, M. Luo, R. Wang, X. Zhang, J. He, D. Wang, W. Zhao and F. Huang, *Inorg. Chem.*, 2019, **58**, 69–72.
- 91 S. L. Brock, N. P. Raju, J. E. Greedan and S. M. Kauzlarich, *J. Alloys Compd.*, 1996, **237**, 9–19.
- 92 J. Nuss and M. Jansen, *Acta Crystallogr. B*, 2007, **63**, 843–849.

- 93 P. Wang, S. Forbes, T. Kolodiazhnyi, K. Kosuda and Y. Mozharivskyj, *J. Am. Chem. Soc.*, 2010, **132**, 8795–8803.
- 94 B. Saparov and S. Bobev, *Acta Crystallogr. Sect. E Struct. Rep. Online*, 2011, **67**, i11–i11.
- 95 A. Pfitzner and P. Pohla, *Z. Für Anorg. Allg. Chem.*, 2009, **635**, 1157–1159.
- 96 J. F. Ackerman, *J. Solid State Chem.*, 1986, **62**, 92–104.
- 97 L. N. Kholodkovskaya, L. G. Akselrud, A. M. Kusainova, V. A. Dolgikh and B. A. Popovkin, *Mater. Sci. Forum*, 1993, **133–136**, 693–696.
- 98 A. P. Richard, J. A. Russell, A. Zakutayev, L. N. Zakharov, D. A. Keszler and J. Tate, *J. Solid State Chem.*, 2012, **187**, 15–19.
- 99 H. Hiramatsu, H. Yanagi, T. Kamiya, K. Ueda, M. Hirano and H. Hosono, *Chem. Mater.*, 2008, **20**, 326–334.
- 100 A. M. Kusainova, P. S. Berdonosov, L. G. Akselrud, L. N. Kholodkovskaya, V. A. Dolgikh and B. A. Popovkin, *J. Solid State Chem.*, 1994, **112**, 189–191.
- 101 R. H. C. Gil, J. Nuss, Y. Grin, W. Hönle and H. G. von Schnering, *Z. Für Krist. - New Cryst. Struct.*, 1998, **213**, 14–14.
- 102 C. Hadenfeldt and H. O. Vollert, *J. Common Met.*, 1988, **144**, 143–151.
- 103 D. Kaczorowski, J. H. Albering, H. Noël and W. Jeitschko, *J. Alloys Compd.*, 1994, **216**, 117–121.
- 104 H. Sakai, N. Tateiwa, T. D. Matsuda, T. Sugai, E. Yamamoto and Y. Haga, *J. Phys. Soc. Jpn.*, 2010, **79**, 074721.
- 105 D. M. Wells, E. Ringe, D. Kaczorowski, D. Gnida, G. André, R. G. Haire, D. E. Ellis and J. A. Ibers, *Inorg. Chem.*, 2011, **50**, 576–589.
- 106 T. Watanabe, H. Yanagi, T. Kamiya, Y. Kamihara, H. Hiramatsu, M. Hirano and H. Hosono, *Inorg. Chem.*, 2007, **46**, 7719–7721.
- 107 M. Tegel, D. Bichler and D. Johrendt, *Solid State Sci.*, 2008, **10**, 193–197.
- 108 B. Lorenz, K. Sasmal, R. P. Chaudhury, X. H. Chen, R. H. Liu, T. Wu and C. W. Chu, 2008.
- 109 I. Schellenberg, T. Nilges and R. Pöttgen, *Z. Für Naturforschung B*, 2008, **63**, 834–840.
- 110 Q. Zhang, C. M. N. Kumar, W. Tian, K. W. Dennis, A. I. Goldman and D. Vaknin, *Phys. Rev. B*, 2016, **93**, 094413.
- 111 H. Lincke, R. Glaum, V. Dittrich, M. Tegel, D. Johrendt, W. Hermes, M. H. Möller, T. Nilges and R. Pöttgen, *Z. Für Anorg. Allg. Chem.*, 2008, **634**, 1339–1348.
- 112 B. I. Zimmer, W. Jeitschko, J. H. Albering, R. Glaum and M. Reehuis, *J. Alloys Compd.*, 1995, **229**, 238–242.
- 113 X. Xu, M. A. Jones, S. J. Cassidy, P. Manuel, F. Orlandi, M. Batuk, J. Hadermann and S. J. Clarke, *Inorg. Chem.*, 2020, **59**, 15898–15912.

- 114 H. Jiang, J.-K. Bao, H.-F. Zhai, Z.-T. Tang, Y.-L. Sun, Y. Liu, Z.-C. Wang, H. Bai, Z.-A. Xu and G.-H. Cao, *Phys. Rev. B*, 2015, **92**, 205107.
- 115 B. C. Sheath, X. Xu, P. Manuel, J. Hadermann, M. Batuk, J. O'Sullivan, R. S. Bonilla and S. J. Clarke, *Inorg. Chem.*, 2022, **61**, 12373–12385.
- 116 R. Nath, V. O. Garlea, A. I. Goldman and D. C. Johnston, *Phys. Rev. B*, 2010, **81**, 224513.
- 117 M. Tegel, F. Hummel, S. Lackner, I. Schellenberg, R. Pöttgen and D. Johrendt, *Z. Für Anorg. Allg. Chem.*, 2009, **635**, 2242–2248.
- 118 T. Ozawa, M. M. Olmstead, S. L. Brock, S. M. Kauzlarich and D. M. Young, *Chem. Mater.*, 1998, **10**, 392–396.
- 119 Y.-L. Sun, H. Jiang, H.-F. Zhai, J.-K. Bao, W.-H. Jiao, Q. Tao, C.-Y. Shen, Y.-W. Zeng, Z.-A. Xu and G.-H. Cao, *J. Am. Chem. Soc.*, 2012, **134**, 12893–12896.
- 120 Y. Liu, W. E. Straszheim, P. Das, F. Islam, T. W. Heitmann, R. J. McQueeney and D. Vaknin, *Phys. Rev. Mater.*, 2018, **2**, 054410.
- 121 E. J. Wildman, N. Emery and A. C. Mclaughlin, *Phys. Rev. B*, 2014, **90**, 224413.
- 122 A. Marcinkova, E. Suard, A. N. Fitch, S. Margadonna and J. W. G. Bos, *Chem. Mater.*, 2009, **21**, 2967–2972.
- 123 D. Kaczorowski, M. Potel and H. Noël, *J. Solid State Chem.*, 1994, **112**, 228–231.
- 124 S. Amano and H. Yamane, *J. Alloys Compd.*, 2016, **675**, 377–380.
- 125 L. Qiao, J. Chen, B. Lv, X. Yang, J. Wu, Y. Cui, H. Bai, M. Li, Y. Li, Z. Ren, J. Dai and Z. Xu, *J. Alloys Compd.*, 2020, **836**, 155229.
- 126 J. Nuss and M. Jansen, *J. Alloys Compd.*, 2009, **480**, 57–59.
- 127 R. Benz, *Acta Crystallogr. B*, 1971, **27**, 853–854.
- 128 H. Mizoguchi and H. Hosono, *J. Am. Chem. Soc.*, 2011, **133**, 2394–2397.
- 129 S. Saha, S. Chanda, A. Dutta, U. Kumar, R. Ranjan and T. P. Sinha, *J. Magn. Magn. Mater.*, 2014, **360**, 80–86.
- 130 J. Nuss, U. Wedig and M. Jansen, *Z. Für Anorg. Allg. Chem.*, 2011, **637**, 1975–1981.
- 131 S.-Q. Xia and S. Bobev, *Acta Crystallogr. Sect. E Struct. Rep. Online*, 2010, **66**, i81–i81.
- 132 S. Forbes, F. Yuan, K. Kosuda, T. Kolodiazhnyi and Y. Mozharivskij, *J. Solid State Chem.*, 2016, **233**, 252–258.
- 133 M. Markov, L. Alaerts, H. P. C. Miranda, G. Petretto, W. Chen, J. George, E. Bousquet, P. Ghosez, G.-M. Rignanese and G. Hautier, *Proc. Natl. Acad. Sci.*, 2021, **118**, e2026020118.
- 134 M. Boss, F. Pickhard, M. Zumdieck and C. Röhr, *Acta Crystallogr. C*, 2001, **57**, 503–504.
- 135 M. Boss, D. Petri, F. Pickhard, P. Zönnchen and C. Röhr, *Z. Für Anorg. Allg. Chem.*, 2005, **631**, 1181–1190.

- 136 G. Derrien, M. Tillard, L. Monconduit and C. Belin, *Acta Crystallogr. C*, 2000, **56**, iuc0000138-e232.
- 137 B. Eisenmann and U. Rössler, *Z. Für Krist. - New Cryst. Struct.*, 2000, **215**, 349–350.
- 138 H. Lincke, T. Nilges and R. Pöttgen, *Z. Für Anorg. Allg. Chem.*, 2006, **632**, 1804–1808.
- 139 R. J. Cava, H. W. Zandbergen, J. J. Krajewski, T. Siegrist, H. Y. Hwang and B. Batlogg, *J. Solid State Chem.*, 1997, **129**, 250–256.
- 140 H. Kotegawa, T. Kawazoe, H. Tou, K. Murata, H. Ogino, K. Kishio and J. Shimoyama, *J. Phys. Soc. Jpn.*, 2009, **78**, 123707.
- 141 Y. Tojo, T. Shibuya, T. Nakamura, K. Shoji, H. Fujioka, M. Matoba, S. Yasui, M. Itoh, S. Iimura, H. Hiramatsu, H. Hosono, S. Hirai, W. Mao, S. Kitao, M. Seto and Y. Kamihara, *J. Phys. Condens. Matter*, 2019, **31**, 115801.
- 142 M. Tegela, I. Schellenberg, F. Hummel, R. Pöttgen and D. Jorendt, *Z. Für Naturforschung B*, 2009, **64**, 815–820.
- 143 D. Chen, T.-T. Zhang, Z.-D. Song, H. Li, W.-L. Zhang, T. Qian, J.-L. Luo, Y.-G. Shi, Z. Fang, P. Richard and H. Ding, *Phys. Rev. B*, 2016, **93**, 140501.
- 144 J. Nuss and M. Jansen, *Z. Für Anorg. Allg. Chem.*, 2014, **640**, 713–718.
- 145 T. Yajima, K. Nakano, Y. Nozaki and H. Kageyama, *Phys. C Supercond. Its Appl.*, 2014, **504**, 36–38.
- 146 T. Yamamoto, T. Yajima, Z. Li, T. Kawakami, K. Nakano, T. Tohyama, T. Yagi, Y. Kobayashi and H. Kageyama, *Inorg. Chem.*, 2021, **60**, 2228–2233.
- 147 K. Nakano, K. Hongo and R. Maezono, *Sci. Rep.*, 2016, **6**, 29661.
- 148 G. M. Darone and S. Bobev, *Crystals*, 2011, **1**, 206–214.
- 149 T. Bartsch, O. Niehaus, D. Johrendt, Y. Kobayashi, M. Seto, P. M. Abdala, M. Bartsch, H. Zacharias, R.-D. Hoffmann, B. Gerke, U. C. Rodewald and R. Pöttgen, *Dalton Trans.*, 2015, **44**, 5854–5866.
- 150 T. Bartsch, O. Niehaus, R.-D. Hoffmann, M. Bartsch, H. Zacharias, D. Johrendt and R. Pöttgen, *J. Mater. Chem. C*, 2016, **4**, 6727–6741.
- 151 T. Bartsch, T. Wiegand, J. Ren, H. Eckert, D. Johrendt, O. Niehaus, M. Eul and R. Pöttgen, *Inorg. Chem.*, 2013, **52**, 2094–2102.
- 152 M. Eul, M. H. Möller, R.-D. Hoffmann, W. Jeitschko and R. Pöttgen, *Z. Für Anorg. Allg. Chem.*, 2012, **638**, 331–335.
- 153 S. Yamanaka, T. Yasunaga, K. Yamaguchi and M. Tagawa, *J. Mater. Chem.*, 2009, **19**, 2573–2582.
- 154 S. Yamanaka, H. Kawaji, K. Hotehama and M. Ohashi, *Adv. Mater.*, 1996, **8**, 771–774.
- 155 R. Juzatr and H. Friedrichsen, *Z. Für Anorg. Allg. Chem.*, 1964, **332**, 173–178.

- 156 R. Juza and J. Heners, *Z. Für Anorg. Allg. Chem.*, 1964, **332**, 159–172.
- 157 X. Liu, D.-Y. Liu, T.-T. Li, D.-M. Chen and L.-J. Zou, *RSC Adv.*, 2021, **11**, 28698–28703.
- 158 S. Yamanaka, K. Hotehama and H. Kawaji, *Nature*, 1998, **392**, 580–582.
- 159 J. Strähle, *Z. Für Anorg. Allg. Chem.*, 1970, **375**, 238–254.
- 160 A. J. D. Barnes, T. J. Prior and M. G. Francesconi, *Chem. Commun.*, 2007, 4638–4640.
- 161 W. Schnick and J. Lücke, *Angew. Chem.*, 1992, **104**, 208–209.
- 162 M. Ströbele, K. Eichele and H.-J. Meyer, *Eur. J. Inorg. Chem.*, 2011, **2011**, 4063–4068.
- 163 J.-A. Dolyniuk, N. Tran, K. Lee and K. Kovnir, *Z. Für Anorg. Allg. Chem.*, 2015, **641**, 1422–1427.
- 164 W. Harrison and J. Trotter, *J. Chem. Soc. Dalton Trans.*, 1972, 623–626.
- 165 W. Haubold, W. Keller and G. Sawitzki, *Angew. Chem.*, 1988, **100**, 958–959.
- 166 H. Preiss, *Z. Für Anorg. Allg. Chem.*, 1971, **380**, 56–64.
- 167 P. H. Collins and M. Webster, *Acta Crystallogr. B*, 1972, **28**, 1260–1264.
- 168 J. Shamir, S. Luski, A. Bino, S. Cohen and D. Gibson, *Inorg. Chem.*, 1985, **24**, 2301–2309.
- 169 M. A. Kraft, S. P. Culver, M. Calderon, F. Böcher, T. Krauskopf, A. Senyshyn, C. Dietrich, A. Zevalkink, J. Janek and W. G. Zeier, *J. Am. Chem. Soc.*, 2017, **139**, 10909–10918.
- 170 H.-J. Deiseroth, S.-T. Kong, H. Eckert, J. Vannahme, C. Reiner, T. Zaiß and M. Schlosser, *Angew. Chem. Int. Ed.*, 2008, **47**, 755–758.
- 171 A. V. Olenov, A. V. Shevelkov and B. A. Popovkin, *J. Solid State Chem.*, 1999, **142**, 14–18.
- 172 J. Wang, D. Kaseman, K. Lee, S. Sen and K. Kovnir, *Chem. Mater.*, 2016, **28**, 4741–4750.
- 173 A. V. Olenov, A. I. Baranov, A. V. Shevelkov and B. A. Popovkin, *Eur. J. Inorg. Chem.*, 2002, **2002**, 547–553.
- 174 P. de Santis, E. Giglio and A. Ripamonti, *J. Inorg. Nucl. Chem.*, 1962, **24**, 469–474.
- 175 H. Menke and H. G. von Schnering, *Z. Für Anorg. Allg. Chem.*, 1973, **395**, 223–238.
- 176 O. Oeckler, H. Mattausch and A. Simon, *Z. Für Naturforschung B*, 2007, **62**, 1377–1382.
- 177 K. A. Kovnir, J. V. Zaikina, L. N. Reshetova, A. V. Olenov, E. V. Dikarev and A. V. Shevelkov, *Inorg. Chem.*, 2004, **43**, 3230–3236.
- 178 M. G. B. Drew and R. Mandyczewsky, *J. Chem. Soc. Inorg. Phys. Theor.*, 1970, 2815–2818.
- 179 M. F. Groh, U. Müller, E. Ahmed, A. Rothenberger and M. Ruck, *Z. Für Naturforschung B*, 2013, **68**, 1108–1122.
- 180 S. Toso, Q. A. Akkerman, B. Martín-García, M. Prato, J. Zito, I. Infante, Z. Dang, A. Moliterni, C. Giannini, E. Bladt, I. Lobato, J. Ramade, S. Bals, J. Buha, D. Spirito, E. Mugnaioli, M. Gemmi and L. Manna, *J. Am. Chem. Soc.*, 2020, **142**, 10198–10211.

- 181 Z. Liu, T. Zinkevich, S. Indris, X. He, J. Liu, W. Xu, J. Bai, S. Xiong, Y. Mo and H. Chen, *Inorg. Chem.*, 2020, **59**, 226–234.
- 182 M. Smith and G. J. Miller, *J. Solid State Chem.*, 1998, **140**, 226–232.
- 183 S. Pohl, *Angew. Chem.*, 1976, **88**, 162–163.
- 184 T. Sakuma and S. Hoshino, *J. Phys. Soc. Jpn.*, 1980, **49**, 678–683.
- 185 W. Zhou, Z.-H. Shi, W. Liu and S.-P. Guo, *J. Alloys Compd.*, 2022, **895**, 162602.
- 186 A. G. Mikolaichuk, N. V. Moroz and P. Yu. Demchenko, *Phys. Solid State*, 2010, **52**, 237–240.
- 187 P. Schwarz, J. Wachter and M. Zabel, *Eur. J. Inorg. Chem.*, 2008, **2008**, 5460–5463.
- 188 K. Feng, W. Yin, Z. Lin, J. Yao and Y. Wu, *Inorg. Chem.*, 2013, **52**, 11503–11508.
- 189 H.-J. Zhao and P.-F. Liu, *J. Solid State Chem.*, 2015, **232**, 37–41.
